# Supplementary material for: The photocatalytic mechanism of organic dithienophosphole derivatives as highly efficient photo-redox catalysts
Source: Royal Society of Chemistry journal article supplement (doi:10.1039/d0cp03332d), 2020-01-01
Supplement: d0cp03332d1.pdf [file d0cp03332d1.pdf]

## Electronic Supplementary Information

### Photocatalytic Mechanism of Organic Dithienophosphole Derivatives as Highly Efficient Photo-redox Catalysts

Ping-Ping Sun,<sup>a</sup> Weijie Chi,<sup>b</sup> Devesh R. Kripalani,<sup>a</sup> Kun Zhou<sup>a,c\*</sup>

<sup>a</sup> *Singapore Centre for 3D Printing, School of Mechanical and Aerospace Engineering, Nanyang Technological University, 50 Nanyang Avenue, Singapore 639798, Singapore*

<sup>b</sup> *Science, Mathematics and Technology Cluster, Singapore University of Technology and Design, 8 Somapah Road, Singapore 487372, Singapore*

<sup>c</sup> *Environmental Process Modelling Centre, Nanyang Environment and Water Research Institute, Nanyang Technological University, 1 CleanTech Loop, Singapore 637141, Singapore*

## Table of Contents

|                                                                                                             |     |
|-------------------------------------------------------------------------------------------------------------|-----|
| Note S1. Kinetic Analysis of the Activation Mechanism by Modified Marcus Theory .....                       | 4   |
| Note S1.1 Act-1 PC–Ar <sub>2</sub> I <sup>+</sup> activation process.....                                   | 4   |
| Note S1.2 Standard reduction potential calculation of ArI .....                                             | 8   |
| Note S1.3 Act-2 PC–ArI activation process .....                                                             | 9   |
| Note S1.4 Act-3 PC–EDB activation process .....                                                             | 11  |
| Note S2. Calculations of activation energies for deactivation pathways .....                                | 13  |
| Note S2.1 Rate of biradical termination.....                                                                | 13  |
| Note S2.2 Deactivation processes in the two-component PC–Ar <sub>2</sub> I <sup>+</sup> system .....        | 14  |
| Note S2.3 Deactivation processes in the three-component PC–Ar <sub>2</sub> I <sup>+</sup> –EDB system ..... | 244 |
| Note S2.4 Deactivation processes in the PC–EDB system.....                                                  | 39  |
| Reference.....                                                                                              | 49  |

## List of Tables

|                                                                                                     |    |
|-----------------------------------------------------------------------------------------------------|----|
| Table S1. Geometric, thermodynamic and kinetic parameters in the activation processes. ....         | 6  |
| Table S2. Calculated activation barriers of each proposed deactivation path, A1-A10. ....           | 24 |
| Table S3. Calculated activation barriers of each proposed deactivation path, B, B' and B1-B10. .... | 39 |
| Table S4. Calculated activation energies of proposed deactivation paths D, D' and E. ....           | 45 |
| Table S5. Calculated rate constants of proposed deactivation paths of D and E. ....                 | 45 |

## List of Figures

|                                                                                                                                                                                                                                                                                                                                                                                                                                                                                                                      |    |
|----------------------------------------------------------------------------------------------------------------------------------------------------------------------------------------------------------------------------------------------------------------------------------------------------------------------------------------------------------------------------------------------------------------------------------------------------------------------------------------------------------------------|----|
| Fig. S1. Stable structures of the DTPs in the ground state and excited state, oxidized radical cations and radical anions shown in the activation processes, as well as the relevant structures of the electron donor EDB/acceptor $\text{Ar}_2\text{I}^+$ (gray: C, white: H, yellow: S, red: O, aurantia: P, blue N, purple: I). ....                                                                                                                                                                              | 13 |
| Fig. S2. Energy profiles of $\text{Ph-DTP}^{*+}/\text{EDB}/\text{I}^-/\text{ArI}/\text{Ar}^\bullet$ following B, B'-1 and B'-2 deactivation paths. ....                                                                                                                                                                                                                                                                                                                                                              | 28 |
| Fig. S3. Energy profiles of $\text{TPA-DTP}^{*+}/\text{EDB}/\text{I}^-/\text{ArI}/\text{Ar}^\bullet$ following B, B'-1 and B'-2 deactivation paths. ....                                                                                                                                                                                                                                                                                                                                                             | 28 |
| Fig. S4. Stable structures of radical cation complexes of type $\text{EDB}^{*+}\text{-ArI}$ and $\text{EDB}^{*+}\text{-I}^-$ . ....                                                                                                                                                                                                                                                                                                                                                                                  | 29 |
| Fig. S5. Energy profiles of $\text{Ph-DTP}^{*+}/\text{EDB}/\text{Ar}_2\text{I}^+$ following E series deactivation paths. ....                                                                                                                                                                                                                                                                                                                                                                                        | 46 |
| Fig. S6. Energy profiles of $\text{TPA-DTP}^{*+}/\text{EDB}/\text{Ar}_2\text{I}^+$ following E series deactivation paths. ....                                                                                                                                                                                                                                                                                                                                                                                       | 46 |
| Fig. S7. The overall main mechanism in photo-catalyst cycle of (a) DTPs- $\text{Ar}_2\text{I}^+$ system following Act-1 activation process and A1-A5 deactivation processes, (b) DTPs-ArI system following Act-2 activation process and A6-A10 deactivation processes, (c) DTPs- $\text{Ar}_2\text{I}^+\text{-EDB}$ system following Act-1 activation process and B, B'-1, B1-B5 deactivation processes, (d) DTPs-ArI-EDB system following Act-2 activation process and B, B'-2, B6-B10 deactivation processes. .... | 47 |

## Note S1. Kinetic Analysis of the Activation Mechanism by Modified Marcus Theory

In order to obtain further insights into the mechanisms of the activation processes, the investigation on electron transfer (ET) kinetics is of great importance. Marcus theory has been well-known for describing ET processes,<sup>1</sup> although this theory cannot be simply used for the current assessment of ET kinetics because a concerted dissociative electron transfer (DET) to Ar<sub>2</sub>I<sup>+</sup>/EDB is involved in the reaction process.<sup>2-6</sup> However, a modified model of Marcus theory, proposed by Savéant,<sup>7-9</sup> is accessible and has already been used to analyze the dynamics of DET processes successfully.<sup>3-5, 10, 11</sup> Besides, inner- and outer-sphere electron transfer (ISET and OSET) mechanisms have also been analyzed by using such modified Marcus theory.<sup>1, 7</sup>

### Note S1.1 Act-1 PC–Ar<sub>2</sub>I<sup>+</sup> activation process

The reduction of Ar<sub>2</sub>I<sup>+</sup> and activation of PCs (Ph-DTP and TPA-DTP) undergo the following reaction paths (S1, S2), where an outer-sphere electron transfer (OSET) occurs from the donor (PC\*) to the acceptor (Ar<sub>2</sub>I<sup>+</sup>) by breaking the concerted C-I bond in Ar<sub>2</sub>I<sup>+</sup>. This process is also known as DET.

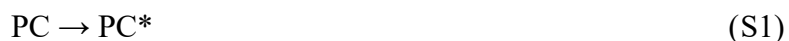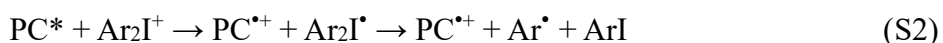

According to the sticky model of DET theory,<sup>4, 7, 8, 10</sup> the rate constant  $k_{\text{act}}$  of the Act-1 activation process can be calculated via the following equations.

$$k_{\text{act}} = Z \exp\left(-\frac{\Delta G^\ddagger}{RT}\right) \quad (\text{S3})$$

$$\Delta G^\ddagger = \Delta G_0^\ddagger \left(1 + \frac{\Delta_r G^\theta - D_p}{4\Delta G_0^\ddagger}\right)^2 \quad (\text{S4})$$

$$\Delta G_0^\ddagger = \frac{\lambda_0 + (\sqrt{D_B} - \sqrt{D_P})^2}{4} \quad (\text{S5})$$

$$\Delta_r G^\theta = F\left(E_{\text{PC}^{\bullet+}/\text{PC}^*}^\theta - E_{\text{Ar}_2\text{I}^+/\text{Ar}_2\text{I}^\bullet}^\theta\right) - \frac{N_A e^2}{4\pi\epsilon_0\epsilon r} \quad (\text{S6})$$

$$E_{\text{PC}^{\bullet+}/\text{PC}^*}^{\theta} = E_{\text{PC}^{\bullet+}/\text{PC}}^{\theta} - E_{\text{hv}} = E_{\text{PC}^{\bullet+}/\text{PC}}^{\theta} - \frac{hc}{\lambda_{\text{max}}} \quad (\text{S7})$$

$$Z = N_{\text{A}} \sqrt{\frac{8\pi RT}{\mu}} (r_{\text{PC}^*} + r_{\text{Ar}_2\text{I}^+})^2 \quad (\text{S8})$$

$$\lambda_0 = 95 \left( \frac{1}{2r_{\text{PC}^*}} + \frac{1}{2r_{\text{eff}}} - \frac{1}{r_{\text{PC}^*} + r_{\text{eff}}} \right) \quad (\text{S9})$$

$$\varphi_{\text{act}} = k_{\text{act}} [\text{Ar}_2\text{I}^+] \tau_0 \Phi_{\text{F}} \quad (\text{S10})$$

In the above equations, PC refers to the photo-redox catalyst used in this work, namely, the DTP derivatives (TPA-DTP and Ph-DTP). In eq S3,  $\Delta G^{\ddagger}$  is the activation free energy, and can be considered as the activation barrier of the reaction.  $Z$  is the pre-exponential factor, and can be calculated by eq S8, in which,  $N_{\text{A}}$  is the Avogadro constant,  $\mu$  is the reduced mass,  $R$  is the gas constant and  $T$  is the temperature. Both  $r_{\text{PC}^*}$  and  $r_{\text{Ar}_2\text{I}^+}$  are the radii of the respective molecules obtained from the computed volume of the molecules shown in Table S1, which are based on an isoelectronic density surface of 0.001 electrons/Bohr<sup>3</sup> by using the DFT optimized structures.  $\Delta G_0^{\ddagger}$  is the intrinsic barrier of the reaction, which is the activation free energy when  $\Delta_r G^{\theta} = 0$  and can be calculated by eq S5. In eq S5,  $D_{\text{B}}$  is the bond dissociation energy of  $\text{Ar}_2\text{I}^{\bullet}$ , obtained from DFT calculations.  $D_{\text{p}}$  is the interaction energy produced between ion-dipole adducts.  $\lambda_0$  is the solvent reorganization energy and can be determined by using an empirical equation as shown in eq S9,<sup>12</sup> <sup>13</sup> where  $r_{\text{eff}}$  is the effective radius of  $\text{Ar}_2\text{I}^+$ , defined as  $r_{\text{eff}} = (2r_{\text{Ar}_2\text{I}^+} - r_{\text{ArI}})r_{\text{ArI}}/r_{\text{Ar}_2\text{I}^+}$ .

$\Delta_r G^{\theta}$  in eq S4 refers to the reaction free energy.  $\Delta_r G^{\theta}$  of reaction S2 can be calculated from the standard potentials of the electron donor ( $\text{PC}^{\bullet+}/\text{PC}^*$ ) and acceptor ( $\text{Ar}_2\text{I}^+/\text{Ar}^{\bullet} + \text{ArI}$ ) redox couples,  $E_{\text{PC}^{\bullet+}/\text{PC}^*}^{\theta}$  and  $E_{\text{Ar}_2\text{I}^+/\text{Ar}^{\bullet} + \text{ArI}}^{\theta}$ , as shown in eq S6.<sup>14</sup> In this equation,  $E_{\text{Ar}_2\text{I}^+/\text{Ar}^{\bullet} + \text{ArI}}^{\theta}$  is the standard reduction potential in the ground state, while  $E_{\text{PC}^{\bullet+}/\text{PC}^*}^{\theta}$  is the standard oxidation potential in the excited state and can be obtained from eq S7 by considering the relationship between the standard oxidation potential of the donor  $\text{PC}^{\bullet+}$  in the ground state and the excitation energy of the excited reactant  $E_{\text{hv}}$ .  $E_{\text{hv}}$  equals to  $hc/\lambda_{\text{max}}$ , where  $h$  is the Planck constant,  $c$  is the speed of light, and  $\lambda_{\text{max}}$  is the wavelength of maximum emission intensity of the excited state. In eq S6,  $e$  is the elementary charge,  $\varepsilon_0$  is the permittivity of vacuum, and  $\varepsilon$  is the relative permittivity of the solvent at room

temperature. The last term is the Columbic energy experienced by the radical ion pair at a distance  $r$ , where  $r$  is approximately the sum of the radii of two hitting molecules  $r = r_{PC^*} + r_{Ar_2I^+}$ .

The activation of  $PC^*$  has to compete with all decay pathways (radiative and nonradiative) that can bring themselves back to their ground state. The quantum yield for the reaction from a given excited state can be calculated by eq S10, whereby  $\Phi_F$  is the fluorescence quantum efficiency for the generation of the excited state,  $\tau_0$  is the lifetime of the excited state, and  $[Ar_2I^+]$  is the concentration, which is considered to be roughly constant during the reaction.

**Table S1.** Geometric, thermodynamic and kinetic parameters in the activation processes.

| Donor    | Acceptor                       | $r_{donor}^a$<br>/Å | $r_{acceptor}^b$<br>/Å | $r_{eff}$<br>/Å | $\lambda_0$<br>/kcal mol <sup>-1</sup> | $D_B$<br>/kcal mol <sup>-1</sup> | $D_P$<br>/kcal mol <sup>-1</sup> |
|----------|--------------------------------|---------------------|------------------------|-----------------|----------------------------------------|----------------------------------|----------------------------------|
| Ph-TPA*  | Ar <sub>2</sub> I <sup>+</sup> | 9.54                | 8.04                   | 7.371           | 5.81                                   | 2.75                             | 0.86                             |
| TPA-DTP* | Ar <sub>2</sub> I <sup>+</sup> | 14.02               | 8.04                   | 7.371           | 5.39                                   | 2.75                             | 0.86                             |
| Ph-TPA*  | ArI                            | 9.54                | 5.72                   | 3.275           | 12.07                                  | 35.06                            | 1.34                             |
| TPA-DTP* | ArI                            | 14.02               | 5.72                   | 3.275           | 12.4                                   | 35.06                            | 1.34                             |
| EDB      | Ph-TPA*                        | 6.91                | 9.54                   | —               | 6.08                                   | 177.08 <sup>c</sup>              | —                                |
| EDB      | TPA-DTP*                       | 6.91                | 14.02                  | —               | 5.73                                   | 177.08 <sup>c</sup>              | —                                |

<sup>a</sup> donor radius, <sup>b</sup> acceptor radius, <sup>c</sup> bond dissociation energy of  $EDB^{++} \rightarrow EDB^*(-H) + H^+$ ,

With the calculated maximum emission wavelength of both DTPs (Fig. 1), their standard oxidation potential can be obtained from eq S7, where

$$E_{PC^+/PC^*}^{\bullet} (Ph-DTP) = E_{PC^+/PC}^{\bullet} (Ph-DTP) - E_{hv} = 1.13 \text{ V} - (6.63 \times 10^{-34} \text{ J s} \times 3 \times 10^8 \text{ m/s}) / (559 \text{ nm} \times 1.602 \times 10^{-19} \text{ C}) = -1.09 \text{ V vs. SCE}$$

$$E_{PC^+/PC^*}^{\bullet} (TPA-DTP) = E_{PC^+/PC}^{\bullet} (TPA-DTP) - E_{hv} = 0.79 \text{ V} - (6.63 \times 10^{-34} \text{ J s} \times 3 \times 10^8 \text{ m/s}) / (615 \text{ nm} \times 1.602 \times 10^{-19} \text{ C}) = -1.23 \text{ V vs. SCE}$$

Since the reduction potential of  $Ar_2I^+$  is  $-0.73 \text{ V vs SCE}^{15}$  in acetonitrile (MeCN), the reaction free energy under each PC activation process can then be obtained by eq S6, where

$$\Delta_r G^{\bullet} (Ph-DTP) = 96485 \text{ C mol}^{-1} (-1.09 + 0.73) \text{ V} - 6.022 \times 10^{23} \text{ mol}^{-1} \times (1.602 \times 10^{-19} \text{ C})^2 / (4 \times$$

$$3.14 \times 8.854 \times 10^{-12} \text{ J}^{-1}\text{C}^2\text{m}^{-1} \times 37.5 \times (9.542 + 8.038) \times 10^{-10} \text{ m}) = -36.842 \text{ kJ mol}^{-1} = -8.8 \text{ kcal mol}^{-1}$$

$$\Delta_r G^\theta (\text{TPA-DTP}) = 96485 \text{ C mol}^{-1} (-1.23 + 0.73) \text{ V} - 6.022 \times 10^{23} \text{ mol}^{-1} \times (1.602 \times 10^{-19} \text{ C})^2 / (4 \times 3.14 \times 8.854 \times 10^{-12} \text{ J}^{-1}\text{C}^2\text{m}^{-1} \times 37.5 \times (14.017 + 8.038) \times 10^{-10} \text{ m}) = -49.92 \text{ kJ mol}^{-1} = -11.93 \text{ kcal mol}^{-1}$$

With the obtained geometric parameters (Table S1), the solvent reorganization energy can be calculated by eq S9,

$$\lambda_0 (\text{Ph-DTP}) = 95 \left( \frac{1}{2r_{\text{PC}^*}} + \frac{1}{2r_{\text{eff}}} - \frac{1}{r_{\text{PC}^*} + r_{\text{eff}}} \right) \\ = 95 [1/(2 \times 9.542 \text{ \AA}) + 1/(2 \times 7.371 \text{ \AA}) - 1/(9.542 \text{ \AA} + 7.371 \text{ \AA})] = 5.81 \text{ kcal/mol}$$

$$\lambda_0 (\text{TPA-DTP}) = 95 \left( \frac{1}{2r_{\text{PC}^*}} + \frac{1}{2r_{\text{eff}}} - \frac{1}{r_{\text{PC}^*} + r_{\text{eff}}} \right) \\ = 95 [1/(2 \times 14.017 \text{ \AA}) + 1/(2 \times 7.371 \text{ \AA}) - 1/(14.017 \text{ \AA} + 7.371 \text{ \AA})] = 5.39 \text{ kcal/mol}$$

With the calculated  $D_B$  and  $D_p$  (Table S1), the intrinsic barrier  $\Delta G_0^\ddagger$  and the activation free energy  $\Delta G^\ddagger$  in each Act-1 activation process can be obtained by eqs S5 and S4, where

$$\Delta G_0^\ddagger (\text{Ph-DTP}) = (5.81 \text{ kcal/mol} + ((2.75 \text{ kcal/mol})^{1/2} - (0.86 \text{ kcal/mol})^{1/2})^2) / 4 = 1.586 \text{ kcal/mol}$$

$$\Delta G_0^\ddagger (\text{TPA-DTP}) = (5.39 \text{ kcal/mol} + ((2.75 \text{ kcal/mol})^{1/2} - (0.86 \text{ kcal/mol})^{1/2})^2) / 4 = 1.481 \text{ kcal/mol}$$

$$\Delta G^\ddagger (\text{Ph-DTP}) = 1.586 \text{ kcal mol}^{-1} \times (1 + (-8.8 \text{ kcal mol}^{-1} - 0.86 \text{ kcal mol}^{-1}) / (4 \times 1.586 \text{ kcal mol}^{-1}))^2 \\ = 0.433 \text{ kcal mol}^{-1}$$

$$\Delta G^\ddagger (\text{TPA-DTP}) = 1.481 \text{ kcal mol}^{-1} \times (1 + (-11.93 \text{ kcal mol}^{-1} - 0.86 \text{ kcal mol}^{-1}) / (4 \times 1.481 \text{ kcal mol}^{-1}))^2 = 1.989 \text{ kcal mol}^{-1}$$

To obtain the rate constant  $k_{\text{act}}$  of the Act-1 activation process, the pre-exponential factor  $Z$  should first be calculated by eq S8, in which  $\mu$  can be obtained by

$$\mu = \frac{M_{\text{DTP}} M_{\text{Ar}_2\text{I}^+}}{M_{\text{DTP}} + M_{\text{Ar}_2\text{I}^+}}$$

$$\mu (\text{Ph-DTP}) = 440 \text{ g mol}^{-1} \times 393 \text{ g mol}^{-1} / (440 \text{ g mol}^{-1} + 393 \text{ g mol}^{-1}) = 207.59 \text{ g mol}^{-1}$$

$$\mu (\text{TPA-DTP}) = 774 \text{ g mol}^{-1} \times 393 \text{ g mol}^{-1} / (774 \text{ g mol}^{-1} + 393 \text{ g mol}^{-1}) = 260.65 \text{ g mol}^{-1}$$

$$\begin{aligned}
Z(\text{Ph-DTP}) &= N_A \sqrt{\frac{8\pi RT}{\mu}} (r_{\text{Ph-DTP}^*} + r_{\text{Ar}_2\text{I}^+})^2 \\
&= 6.022 \times 10^{23} \text{ mol}^{-1} \times (8 \times 3.14 \times 8.314 \text{ J mol}^{-1}\text{K}^{-1} \times 298.15 \text{ K} / 207.59 \text{ g mol}^{-1})^{1/2} \times (17.58 \text{ \AA})^2 \\
&= 1.02 \times 10^9 \text{ mol}^{-1}\text{s}^{-1}\text{m}^3 = 1.02 \times 10^{12} \text{ M}^{-1}\text{s}^{-1}
\end{aligned}$$

$$\begin{aligned}
Z(\text{TPA-DTP}) &= N_A \sqrt{\frac{8\pi RT}{\mu}} (r_{\text{TPA-DTP}^*} + r_{\text{Ar}_2\text{I}^+})^2 \\
&= 6.022 \times 10^{23} \text{ mol}^{-1} \times (8 \times 3.14 \times 8.314 \text{ J mol}^{-1}\text{K}^{-1} \times 298.15 \text{ K} / 260.65 \text{ g mol}^{-1})^{1/2} \times (22.055 \text{ \AA})^2 \\
&= 1.43 \times 10^9 \text{ mol}^{-1}\text{s}^{-1}\text{m}^3 = 1.43 \times 10^{12} \text{ M}^{-1}\text{s}^{-1}
\end{aligned}$$

With the obtained  $Z$  and  $\Delta G^\ddagger$ , the rate constant  $k_{\text{act}}$  of each Act-1 activation process can be obtained by eq S3, where

$$k_{\text{act}}(\text{Ph-DTP}) = 1.02 \times 10^{12} \text{ M}^{-1}\text{s}^{-1} \times \exp(-0.433 \text{ kcal mol}^{-1} / (8.314 \text{ J mol}^{-1}\text{K}^{-1} \times 298.15 \text{ K})) = 4.91 \times 10^{11} \text{ M}^{-1}\text{s}^{-1}$$

$$k_{\text{act}}(\text{TPA-DTP}) = 1.43 \times 10^{12} \text{ M}^{-1}\text{s}^{-1} \times \exp(-1.989 \text{ kcal mol}^{-1} / (8.314 \text{ J mol}^{-1}\text{K}^{-1} \times 298.15 \text{ K})) = 4.97 \times 10^{10} \text{ M}^{-1}\text{s}^{-1}$$

The calculated lifetimes of the excited state of Ph-DTP and TPA-DTP are 4.41 ns and 3.57 ns, respectively. Combining the experimental concentration of  $\text{Ar}_2\text{I}^+$  (0.0184 M) and the roughly determined  $\Phi_F$  (on average 0.01), the quantum yield for the Act-1 reactions can be obtained by eq S10, where

$$\varphi_{\text{act}}(\text{Ph-DTP}) = 4.91 \times 10^{11} \text{ M}^{-1}\text{s}^{-1} \times 0.0184 \text{ M} \times 4.41 \times 10^{-9} \text{ s} \times 0.01 = 0.4$$

$$\varphi_{\text{act}}(\text{TPA-DTP}) = 4.97 \times 10^{10} \text{ M}^{-1}\text{s}^{-1} \times 0.0184 \text{ M} \times 3.57 \times 10^{-9} \text{ s} \times 0.01 = 3.27 \times 10^{-2}$$

### Note S1.2 Standard reduction potential calculation of $\text{ArI}$ $E_{\text{ArI}/\text{Ar}^\bullet+\text{I}^-}^0$

The reduction of  $\text{ArI}$ , similar with that of  $\text{Ar}_2\text{I}^+$ , yields  $\text{I}^-$  and  $\text{Ar}^\bullet$  in one step and can formally be expressed as the sum of the homolytic dissociation of a C-I bond and one-electron reduction of the resulting radical,  $\text{I}^\bullet$  to  $\text{I}^-$  (note that the reduction of  $\text{Ar}_2\text{I}^+$  yields  $\text{ArI}$  and  $\text{Ar}^\bullet$  in one step following a one-electron reduction of the resulting radical cation). Thus, the standard potential<sup>15</sup> for the overall reaction can be calculated as:



$$E_{\text{ArI}/\text{Ar}^\bullet + \text{I}^-}^\theta = -(\text{BDE}_{\text{gas}} + \Delta\Delta G_{0 \rightarrow 298\text{K}, \text{gas}}^\theta + \Delta G_{1\text{atm} \rightarrow 1\text{M}} + \Delta\Delta G_{\text{solv}}^\theta)/F + E_{\text{I}^\bullet/\text{I}^-}^\theta$$

where  $\text{BDE}_{\text{gas}}$  is the (zero-point corrected) C-I bond homolytic dissociation energy in ArI, the  $\Delta\Delta G_{0 \rightarrow 298\text{K}, \text{gas}}^\theta$  term is a contribution to the Gibbs energy of heating from 0 to 298 K,  $\Delta G_{1\text{atm} \rightarrow 1\text{M}}$  is a correction for the standard state change from 1 atm to 1 mol L<sup>-1</sup> (1.89 kcal mol<sup>-1</sup> at 298 K), and  $\Delta\Delta G_{\text{solv}}^\theta$  is the difference between the solvation free energies of Ar<sup>•</sup> and I<sup>•</sup>, and ArI. The redox potential for the I<sup>•</sup>/I<sup>-</sup> couple is calculated as:

$$E_{\text{I}^\bullet/\text{I}^-}^\theta = -(-\text{EA}_{\text{gas}} + \Delta\Delta G_{0 \rightarrow 298\text{K}, \text{gas}}^\theta + \Delta\Delta G_{\text{solv}}^\theta)/F$$

where  $\text{EA}_{\text{gas}}$  is the adiabatic electron affinity of I<sup>•</sup> (i.e., the negative of the enthalpy change at 0 K for the reduction), and  $\Delta\Delta G_{\text{solv}}^\theta$  equals to the difference:  $\Delta\Delta G_{\text{solv}}^\theta(\text{I}^\bullet) - \Delta\Delta G_{\text{solv}}^\theta(\text{I}^-)$ .

The reference values of  $\text{BDE}_{\text{gas}}$  (55 kcal mol<sup>-1</sup>) and  $\text{EA}_{\text{gas}}$  (2.81 eV vs. experimental 3.057 eV) are taken from M062X/def2SVP calculations. The calculated thermal correction is -1.67 kcal/mol and  $\Delta\Delta G_{\text{solv}}^\theta$  are -1.813 kcal/mol and -2.67 eV for the C-I bond homolytic dissociation and one-electron reduction reactions, respectively. Thus, the DFT calculated reduction potential of  $E_{\text{ArI}/\text{Ar}^\bullet + \text{I}^-}^\theta$  is -1.43 V.

### Note S1.3 Act-2 PC-ArI activation process

In this activation process, the ArI species, which is the product of Act-1 activation ( $\text{Ar}_2\text{I}^\bullet \rightarrow \text{Ar}^\bullet + \text{ArI}$ ), will act as the acceptor to further activate the PCs. The activation reactions are shown as follows.

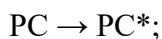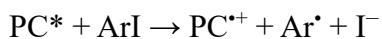

With the obtained reduction potential of  $E_{\text{ArI}/\text{Ar}^\bullet+\text{I}^-}^\theta$ , the reaction free energy in this activation process can be obtained.

$$\Delta_r G^\theta = F(E_{\text{PC}^{\bullet+}/\text{PC}^*}^\theta - E_{\text{ArI}/\text{Ar}^\bullet+\text{I}^-}^\theta) - \frac{N_A e^2}{4\pi\epsilon_0\epsilon r}$$

$$r = r_{\text{PC}^*} + r_{\text{ArI}}$$

$\Delta_r G^\theta$  of Ph-DTP and TPA-DTP are calculated to be 7.26 kcal mol<sup>-1</sup> and 4.16 kcal mol<sup>-1</sup>, respectively.

Its solvent reorganization energy can be obtained by eq S9 using the parameters shown in Table S1.

$$\lambda_0 = 95 \left( \frac{1}{2r_{\text{PC}^*}} + \frac{1}{2r_{\text{eff}}} - \frac{1}{r_{\text{PC}^*}+r_{\text{eff}}} \right)$$

The calculated  $\lambda_0$  of Ph-DTP and TPA-DTP are 12.07 kcal/mol and 12.4 kcal/mol, respectively.

In this activation process, with the calculated  $D_B$  and  $D_p$  of ArI as shown in Table S1, the intrinsic barrier  $\Delta G_0^\ddagger$  and the activation free energy  $\Delta G^\ddagger$  can be calculated by the following equations.

$$\Delta G_0^\ddagger = \frac{\lambda_0 + (\sqrt{D_{\text{B-ArI}}} - \sqrt{D_{\text{p-ArI}}})^2}{4}$$

The intrinsic barrier  $\Delta G_0^\ddagger$  of Ph-DTP and TPA-DTP are calculated to be 8.69 kcal/mol and 8.77 kcal/mol, respectively.

$$\Delta G^\ddagger = \Delta G_0^\ddagger \left( 1 + \frac{\Delta_r G^\theta - D_p}{4\Delta G_0^\ddagger} \right)^2$$

The activation free energy  $\Delta G^\ddagger$  of Ph-DTP and TPA-DTP are then obtained to be 11.9 kcal mol<sup>-1</sup> and 10.24 kcal mol<sup>-1</sup>, respectively.

In Act-2 activation,  $\mu$  are 163.43 g mol<sup>-1</sup> and 194.62 g mol<sup>-1</sup> in Ph-DTP and TPA-DPT activation processes, respectively. The pre-exponential factor  $Z$  of each activation process can be obtained by

$$Z = N_A \sqrt{\frac{8\pi RT}{\mu}} (r_{\text{Ph-DTP}^*} + r_{\text{ArI}})^2$$

$Z$  of Ph-DTP and TPA-DTP are  $8.66 \times 10^{11} \text{ M}^{-1}\text{s}^{-1}$  and  $1.33 \times 10^{12} \text{ M}^{-1}\text{s}^{-1}$ , respectively.

Based on the above parameters, the rate constant  $k_{\text{act}}$  and quantum yield  $\phi_{\text{act}}$  can be obtained.

The concentration of ArI needs to be estimated, and is hereby considered to be around 10% of that of Ar<sub>2</sub>I<sup>+</sup>.

$$k_{\text{act}} = Z \exp\left(-\frac{\Delta G^\ddagger}{RT}\right)$$

The rate constant  $k_{\text{act}}$  of Ph-DTP and TPA-DTP are calculated to be  $1.64 \times 10^3 \text{ M}^{-1}\text{s}^{-1}$  and  $4.14 \times 10^4 \text{ M}^{-1}\text{s}^{-1}$ , respectively.

$$\varphi_{\text{act}} = k_{\text{act}}[\text{ArI}]\tau_0\Phi_F$$

The quantum yield  $\varphi_{\text{act}}$  of Ph-DTP and TPA-DTP are  $1.33 \times 10^{-8}$  and  $2.72 \times 10^{-7}$ , respectively.

#### Note S1.4 Act-3 PC–EDB activation process

Different to Act-1 and Act-2, in the Act-3 activation process, EDB is the donor while PCs\* are the acceptors. The electrons transfer from the donor to the acceptor to form PC<sup>•-</sup> and EDB<sup>•+</sup> species. Lalevée *et al.* have conjectured that one H<sup>•</sup> will break away from EDB<sup>•+</sup>, forming EDB<sup>•</sup>(-H) + H<sup>+</sup>.<sup>16</sup> However, the calculated bond dissociation energy of EDB<sup>•+</sup> → EDB<sup>•</sup>(-H) + H<sup>+</sup> is 177.08 kcal/mol, which demonstrates that it is hard to obtain the dissociative EDB<sup>•</sup>(-H) and H<sup>+</sup>. In this activation path, the reactions are shown as follows.

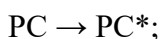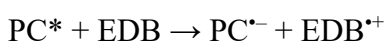

Similar to the oxidation potential of DTPs, the oxidation potential of EDB can be calculated with the following equation, where the DFT calculated  $E_{\text{EDB}^{\bullet+}/\text{EDB}}^\theta$  is 0.855 V. Then,  $E_{\text{EDB}^{\bullet+}/\text{EDB}^*}^\theta$  can be calculated based on the results of  $E_{\text{EDB}^{\bullet+}/\text{EDB}}^\theta$  and the maximum emission wavelength shown in Fig. 1.

$$E_{\text{EDB}^{\bullet+}/\text{EDB}^*}^\theta = E_{\text{EDB}^{\bullet+}/\text{EDB}}^\theta - E_{hv} = 0.855 \text{ V} - (6.63 \times 10^{-34} \text{ J s} \times 3 \times 10^8 \text{ m/s}) / (323 \text{ nm} \times 1.602 \times 10^{-19} \text{ C}) = -2.99 \text{ V}$$

The DFT calculated  $E_{\text{PC}^*/\text{PC}^{\bullet-}}^\theta$  are -1.72 V and -1.77 V for Ph-DTP and TPA-DTP as shown in Table 1, and the reaction free energy of each PC in the Act-3 process can be obtained by

$$\Delta_r G^\theta = F(E_{\text{EDB}^{\bullet+}/\text{EDB}^*}^\theta - E_{\text{PC}^*/\text{PC}^{\bullet-}}^\theta) - \frac{N_A e^2}{4\pi\epsilon_0\epsilon r}$$

$\Delta_r G^\theta$  of Ph-DTP and TPA-DTP are  $-124.79 \text{ kcal mol}^{-1}$  and  $-119.48 \text{ kcal mol}^{-1}$ , respectively.

The solvent reorganization energy can be obtained by eq S9 using the parameters shown in Table S1.

$$\lambda_0 = 95 \left( \frac{1}{2r_{\text{PC}^*}} + \frac{1}{2r_{\text{EDB}}} - \frac{1}{r_{\text{PC}^*} + r_{\text{EDB}}} \right)$$

$\lambda_0$  of Ph-DTP and TPA-DTP are  $6.08 \text{ kcal/mol}$  and  $5.73 \text{ kcal/mol}$ , respectively.

In the main activation process  $\text{PC}^* + \text{EDB} \rightarrow \text{PC}^{\bullet-} + \text{EDB}^{\bullet+}$ , the intrinsic barrier  $\Delta G_0^\ddagger$  and the activation free energy  $\Delta G^\ddagger$  can be calculated by the following equations,

$$\Delta G_0^\ddagger = \frac{\lambda_0}{4}$$

The intrinsic barrier  $\Delta G_0^\ddagger$  of Ph-DTP and TPA-DTP are calculated to be  $1.52 \text{ kcal/mol}$  and  $1.43 \text{ kcal/mol}$ , respectively.

$$\Delta G^\ddagger = \Delta G_0^\ddagger \left( 1 + \frac{\Delta_r G^\theta}{4\Delta G_0^\ddagger} \right)^2$$

The activation free energy  $\Delta G^\ddagger$  of Ph-DTP and TPA-DTP are calculated to be  $579.44 \text{ kcal mol}^{-1}$  and  $565.62 \text{ kcal mol}^{-1}$ , respectively.

In Act-3 activation,  $\mu$  are  $134.15 \text{ g mol}^{-1}$  and  $154.48 \text{ g mol}^{-1}$  in Ph-DTP and TPA-DPT activation processes, respectively. The pre-exponential factor  $Z$  of each activation process can be obtained by

$$Z = N_A \sqrt{\frac{8\pi RT}{\mu}} (r_{\text{Ph-DTP}^*} + r_{\text{EDB}})^2$$

$Z$  of Ph-DTP and TPA-DTP are  $1.11 \times 10^{12} \text{ M}^{-1}\text{s}^{-1}$  and  $1.67 \times 10^{12} \text{ M}^{-1}\text{s}^{-1}$ , respectively.

Based on the above parameters, the rate constant  $k_{\text{act}}$  and quantum yield  $\phi_{\text{act}}$  can be obtained.

Particularly, in the quantum yield calculation, the concentration of DTPs is 100 times lower than that of  $\text{Ar}_2\text{I}^+$  (0.01% PC/1%  $\text{Ar}_2\text{I}^+$  in experimental conditions). According to

$$k_{\text{act}} = Z \exp\left(-\frac{\Delta G^\ddagger}{RT}\right)$$

the rate constant  $k_{\text{act}}$  of Ph-DTP and TPA-DTP are both nearly 0, and consequently, their quantum

yields  $\phi_{\text{act}}$  are also around zero.

Such high activation barrier and ultra-low quantum yield indicate that the activation process Act-3 is hard to carry out, which means that it is in fact difficult for both DTPs\* to be activated by EDB.

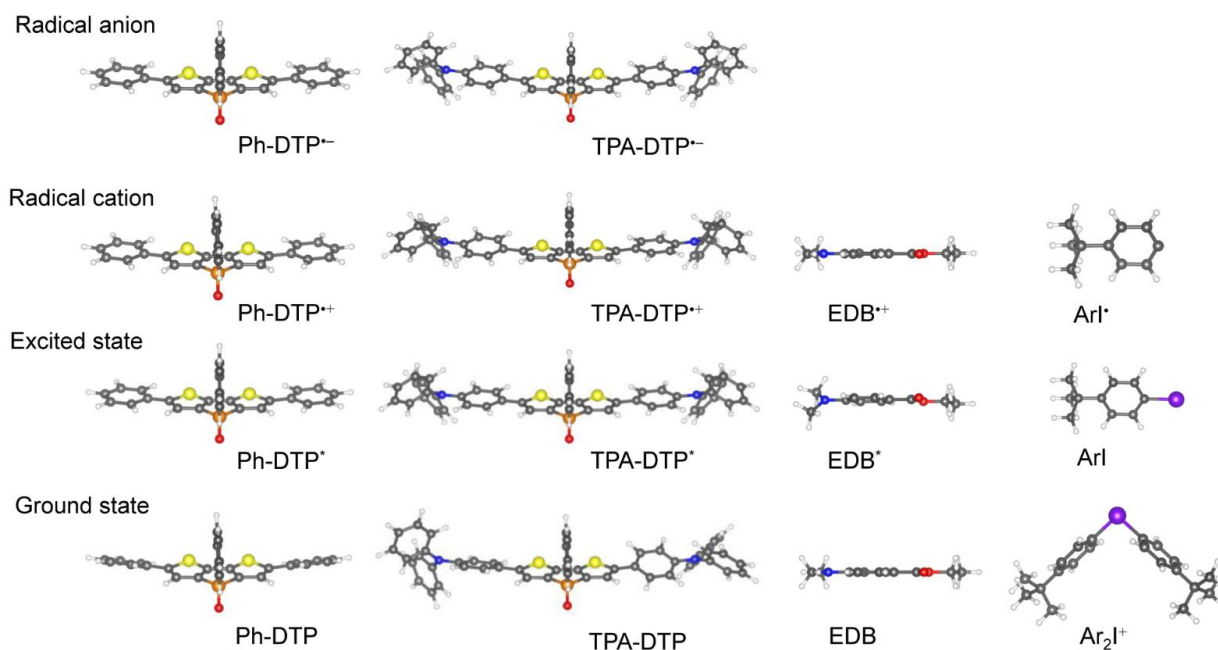

**Fig. S1** Stable structures of the DTPs in the ground state and excited state, oxidized radical cations and radical anions shown in the activation processes, as well as the relevant structures of the electron donor EDB/acceptor  $\text{Ar}_2\text{I}^+$  (gray: C, white: H, yellow: S, red: O, aurantia: P, blue N, purple: I).

## Note S2. Calculations of activation energies for deactivation pathways

### Note S2.1 Rate of biradical termination

The rate constant of biradical termination is estimated from  $R_t = k_t[\text{P}_n^*]^2 = 10^7 \text{ M}^{-1}\text{s}^{-1} \times (4.62 \times 10^{-8} \text{ M})^2 = 2.1 \times 10^{-8} \text{ Ms}^{-1}$ , where  $[\text{P}_n^*]$  is the concentration of the propagating radical and can be calculated from  $k_p^{\text{app}} = k_p[\text{P}_n^*]$ , using  $k_p$  and  $k_p^{\text{app}}$  values of  $10^3 \text{ M}^{-1}\text{s}^{-1}$  and  $4.62 \times 10^{-5} \text{ s}^{-1}$ , respectively, where  $k_p^{\text{app}}$  is the apparent rate constant of propagation.<sup>11</sup> Here, for calculation,  $[\text{P}_n^*]$  will be taken

as the concentration of  $\text{Ar}^\bullet$ , since  $\text{Ar}^\bullet$  acts as the initiating species for radical polymerization. As shown in Pan's work,<sup>11</sup> the conversion of PC (Ph-PTZ) is about 45% at 4 h, while in Mousawi's result<sup>17</sup>, the conversion of PC (TPA-DTP) is about 80% at 200 s. Clearly, the DTP-based PCs have faster  $k_p^{\text{app}}$  than the Ph-PTZ-based PC. Since no experimental data on the  $k_p^{\text{app}}$  value of DTP-based PCs have been reported, here, for the basis of calculation and comparison, the values of  $k_p^{\text{app}}$  and  $[\text{Ar}^\bullet]$  are taken to be  $4.62 \times 10^{-5} \text{ s}^{-1}$  and  $4.62 \times 10^{-8} \text{ M}$  as the lowest limit thresholds.  $R_t$  is then used to compare this termination rate to each deactivation rate. In a controlled process, the rate of the deactivation process should be faster than that of biradical termination.

## Note S2.2 Deactivation processes in the two-component PC- $\text{Ar}_2\text{I}^+$ system

### Path A1 – OSET-I deactivation

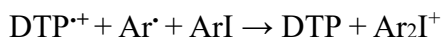

$\Delta G_0^\ddagger$  and  $\lambda_0$  are the same as the values in the Act-1 path.  $\Delta_r G^\theta$  is the calculated reaction free energy, and is  $-32.196 \text{ kcal/mol}$  for the Ph-DTP reaction and  $-24.21 \text{ kcal/mol}$  for the TPA-DTP reaction.

$$\Delta G^\ddagger = \Delta G_0^\ddagger \left( 1 + \frac{\Delta_r G^\theta - D_p}{4\Delta G_0^\ddagger} \right)^2$$

$$\Delta G^\ddagger (\text{Ph-DTP}) = 1.586 \text{ kcal/mol} \times (1 - (32.196 + 0.86)/(4 \times 1.586))^2 = 28.12 \text{ kcal/mol}$$

$$\Delta G^\ddagger (\text{TPA-DTP}) = 1.481 \text{ kcal/mol} \times (1 - (24.21 + 0.86)/(4 \times 1.481))^2 = 15.47 \text{ kcal/mol}$$

$$Z = N_A^2 8\pi^2 \sqrt{\frac{2RT}{\pi}} \left[ \left( \frac{m_A + m_B}{m_A m_B} \right)^{\frac{1}{2}} + \left( \frac{m_B + m_C}{m_B m_C} \right)^{\frac{1}{2}} \right] d_{A \leftrightarrow B}^2 d_{B \leftrightarrow C}^2 \delta$$

where A, B and C are the three species involved in the reaction.  $d$  is the center to center distance between the subscript species.  $\delta$  is the distance between the first two spheres when hit by the third one.  $\delta$  is usually in the range of  $0.3^1$  to  $1.0 \text{ \AA}$ .<sup>18</sup> The smaller value of  $0.3 \text{ \AA}$  is used here. In this equation, A is defined as  $\text{DTP}^{\bullet+}$ , B as  $\text{Ar}^\bullet$  and C as  $\text{ArI}$ .

$$Z (\text{Ph-DTP}) = (6.022 \times 10^{23} \text{ mol}^{-1})^2 \times 8 \times 3.14^2 \times (2 \times 8.314 \text{ J mol}^{-1} \text{ K}^{-1} \times 298.15 \text{ K} / 3.14)^{1/2} \times \{ [(0.44 \text{ kg mol}^{-1} + 0.133 \text{ kg mol}^{-1}) / (0.44 \text{ kg mol}^{-1} \times 0.133 \text{ kg mol}^{-1})]^{1/2} + [(0.133 \text{ kg mol}^{-1} + 0.26 \text{ kg mol}^{-1}) / (0.133 \text{ kg mol}^{-1} \times 0.26 \text{ kg mol}^{-1})]^{1/2} \} \times (14.118 \text{ \AA})^2 \times (10.343 \text{ \AA})^2 \times 0.3 \text{ \AA} = 4.73 \times 10^{11} \text{ M}^{-2} \text{ s}^{-1}$$

$$Z (\text{TPA-DTP}) = (6.022 \times 10^{23} \text{ mol}^{-1})^2 \times 8 \times 3.14^2 \times (2 \times 8.314 \text{ J mol}^{-1} \text{ K}^{-1} \times 298.15 \text{ K} / 3.14)^{1/2} \times \{ [(0.774$$

$$\text{kgmol}^{-1} + 0.133 \text{ kgmol}^{-1}) / (0.774 \text{ kgmol}^{-1} \times 0.133 \text{ kgmol}^{-1})^{1/2} + [(0.133 \text{ kgmol}^{-1} + 0.26 \text{ kgmol}^{-1}) / (0.133 \text{ kgmol}^{-1} \times 0.26 \text{ kgmol}^{-1})]^{1/2} \times (18.554 \text{ \AA})^2 \times (10.343 \text{ \AA})^2 \times 0.3 \text{ \AA} = 7.96 \times 10^{11} \text{ M}^{-2}\text{s}^{-1}$$

According to

$$k_{A1} = Z \exp\left(-\frac{\Delta G^\ddagger}{RT}\right)$$

$$k_{A1} (\text{Ph-DTP}) = 4.73 \times 10^{11} \text{ M}^{-2}\text{s}^{-1} \times \exp(-28.12 \text{ kcal mol}^{-1} / (8.314 \text{ Jmol}^{-1}\text{K}^{-1} \times 298.15 \text{ K})) = 1.15 \times 10^9 \text{ M}^{-2}\text{s}^{-1}$$

$$k_{A1} (\text{TPA-DTP}) = 7.96 \times 10^{11} \text{ M}^{-2}\text{s}^{-1} \times \exp(-15.47 \text{ kcal mol}^{-1} / (8.314 \text{ Jmol}^{-1}\text{K}^{-1} \times 298.15 \text{ K})) = 3.63 \text{ M}^{-2}\text{s}^{-1}$$

The concentration of  $\text{DTP}^{\bullet+}$  cannot be directly detected in electrochemical measurements. Therefore, about 10% of termination is considered here, such that a low concentration of  $1.84 \times 10^{-5} \text{ M}$  is used for  $[\text{DTP}^{\bullet+}]$ , and  $1.84 \times 10^{-3} \text{ M}$  for  $[\text{ArI}]$ .

$$R_{A1} = k_{A1} [\text{DTP}^{\bullet+}][\text{Ar}^\bullet][\text{ArI}]$$

$$R_{A1} (\text{Ph-DTP}) = 1.15 \times 10^9 \text{ M}^{-2}\text{s}^{-1} \times 1.84 \times 10^{-5} \text{ M} \times 4.62 \times 10^{-8} \text{ M} \times 1.84 \times 10^{-3} \text{ M} = 1.8 \times 10^{-24} \text{ Ms}^{-1}$$

$$R_{A1} (\text{TPA-DTP}) = 3.63 \text{ M}^{-2}\text{s}^{-1} \times 1.84 \times 10^{-5} \text{ M} \times 4.62 \times 10^{-8} \text{ M} \times 1.84 \times 10^{-3} \text{ M} = 5.68 \times 10^{-15} \text{ Ms}^{-1}$$

$$R/R_t (\text{Ph-DTP}) = 1.8 \times 10^{-24} / 2.1 \times 10^{-8} = 8.57 \times 10^{-17}$$

$$R/R_t (\text{TPA-DTP}) = 5.68 \times 10^{-15} / 2.1 \times 10^{-8} = 2.7 \times 10^{-7}$$

## Path A2 – OSET-II deactivation

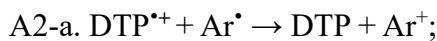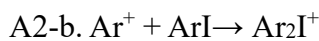

The calculated radii of  $\text{DTP}^{\bullet+}$  and  $\text{Ar}^\bullet$  are 9.497 Å (Ph-DTP $^{\bullet+}$ ), 13.933 Å (TPA-DTP $^{\bullet+}$ ) and 4.621 Å ( $\text{Ar}^\bullet$ ), respectively. The solvent reorganization energy can be calculated by

$$\lambda_0 = 95 \left( \frac{1}{2r_{\text{DTP}^{\bullet+}}} + \frac{1}{2r_{\text{Ar}^\bullet}} - \frac{1}{r_{\text{DTP}^{\bullet+}} + r_{\text{Ar}^\bullet}} \right)$$

$\lambda_0$  of Ph-DTP is 8.58 kcal/mol, and 8.57 kcal/mol for TPA-DTP.

$\Delta_r G^\theta$  is the calculated reaction free energy of the A2-a reaction, where  $\Delta_r G^\theta$  (Ph-DTP) is 5.468 kcal/mol and  $\Delta_r G^\theta$  (TPA-DTP) is 13.457 kcal/mol.

According to  $\Delta G_0^\ddagger = \lambda_0/4$

$\Delta G_0^\ddagger$  is 2.145 kcal/mol for Ph-DTP, and 2.14 kcal/mol for TPA-DTP. According to

$$\Delta G^\ddagger = \Delta G_0^\ddagger \left( 1 + \frac{\Delta_r G^\theta}{4\Delta G_0^\ddagger} \right)^2$$

$\Delta G^\ddagger$  P is 5.75 kcal/mol for Ph-DT, and 14.16 kcal/mol for TPA-DTP.

In the reaction  $\text{DTP}^{*+} + \text{Ar}^\bullet \xrightleftharpoons[k_2]{k_1} \text{DTP} + \text{Ar}^+$ , the reaction equilibrium constant  $k_f$  can be calculated

by  $k_f = \frac{k_1}{k_2} = e^{-\frac{\Delta_r G^\theta}{RT}}$ , where

$$k_1 = Z \exp\left(-\frac{\Delta G^\ddagger}{RT}\right)$$

$k_1$  of Ph-DTP and TPA-DTP are  $5.685 \times 10^7 \text{ M}^{-1}\text{s}^{-1}$  and  $64.14 \text{ M}^{-1}\text{s}^{-1}$ , respectively.

$$k_f(\text{Ph-DTP}) = \exp(-\Delta_r G^\theta/RT) = 9.768 \times 10^{-5}$$

$$k_f(\text{TPA-DTP}) = \exp(-\Delta_r G^\theta/RT) = 1.36 \times 10^{-10}$$

$$k_2(\text{Ph-DTP}) = k_1/k_f = 5.82 \times 10^{11} \text{ M}^{-1}\text{s}^{-1}$$

$$k_2(\text{TPA-DTP}) = k_1/k_f = 4.72 \times 10^{11} \text{ M}^{-1}\text{s}^{-1}$$

This confirms that the reaction between DTP and  $\text{Ar}^+$  is faster than that between  $\text{DTP}^{*+}$  and  $\text{Ar}^\bullet$  ( $k_2 > k_1$ ).

$$Z(\text{Ph-DTP}) = N_A \sqrt{\frac{8\pi RT}{\mu}} (r_{\text{DTP}} + r_{\text{ArI}})^2$$

$Z$  is  $9.37 \times 10^{11} \text{ M}^{-1}\text{s}^{-1}$  for Ph-DTP, and  $1.54 \times 10^{12} \text{ M}^{-1}\text{s}^{-1}$  for TPA-DTP.

$$\mu = \frac{M_{\text{DTP}^{*+}} M_{\text{Ar}^\bullet}}{M_{\text{DTP}^{*+}} + M_{\text{Ar}^\bullet}}$$

$\mu$  of Ph-DTP is  $102.13 \text{ g mol}^{-1}$ , and  $113.5 \text{ g mol}^{-1}$  for TPA-DTP.

Then  $R_1$ , calculated by  $k_1[\text{DTP}^{*+}][\text{Ar}^\bullet]$ , is  $4.83 \times 10^{-5} \text{ Ms}^{-1}$  for Ph-DTP, and  $5.45 \times 10^{-11} \text{ Ms}^{-1}$  for TPA-DTP.

In the A2-b reaction,  $\text{Ar}^+ + \text{ArI} \xrightarrow{k_{\text{diff}}} \text{Ar}_2\text{I}^+$

$$k_{\text{diff}} = \frac{8RT}{3\eta}$$

$$k_{\text{diff}} = 1.787 \times 10^{10} \text{ M}^{-1}\text{s}^{-1}$$

$$\frac{d[\text{Ar}^+]}{dt} = k_1[\text{DTP}^{*+}][\text{Ar}^\bullet] - k_2[\text{DTP}][\text{Ar}^+] - k_{\text{diff}}[\text{Ar}^+][\text{ArI}] = 0$$



$$[Ar^+] = \frac{k_1[DTP^{*+}][Ar^*]}{k_2[DTP] + k_{diff}[ArI]}$$

$$[Ar^+] (Ph-DTP) = 5.685 \times 10^7 M^{-1}s^{-1} \times 1.84 \times 10^{-5} M \times 4.62 \times 10^{-8} M / (5.82 \times 10^{11} M^{-1}s^{-1} \times 1.84 \times 10^{-4} M + 1.787 \times 10^{10} M^{-1}s^{-1} \times 1.84 \times 10^{-3} M) = 3.453 \times 10^{-13} M$$

$$[Ar^+] (TPA-DTP) = 64.14 M^{-1}s^{-1} \times 1.84 \times 10^{-5} M \times 4.62 \times 10^{-8} M / (4.72 \times 10^{11} M^{-1}s^{-1} \times 1.84 \times 10^{-4} M + 1.787 \times 10^{10} M^{-1}s^{-1} \times 1.84 \times 10^{-3} M) = 4.55 \times 10^{-19} M$$

$$R_{overall} = k_{diff}[Ar^+][ArI]$$

$$R_{overall} (Ph-DTP) = 1.787 \times 10^{10} M^{-1}s^{-1} \times 3.453 \times 10^{-13} M \times 1.84 \times 10^{-3} M = 1.14 \times 10^{-5} Ms^{-1}$$

$$R_{overall} (TPA-DTP) = 1.787 \times 10^{10} M^{-1}s^{-1} \times 4.55 \times 10^{-19} M \times 1.84 \times 10^{-3} M = 1.5 \times 10^{-11} Ms^{-1}$$

$$R/R_t (Ph-DTP) = 1.14 \times 10^{-5} Ms^{-1} / 2.1 \times 10^{-8} Ms^{-1} = 543$$

$$R/R_t (TPA-DTP) = 1.5 \times 10^{-11} Ms^{-1} / 2.1 \times 10^{-8} Ms^{-1} = 7.14 \times 10^{-4}$$

### Path A3 – ISET deactivation

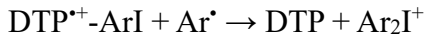

The calculated radii of  $DTP^{*+}-ArI$  and  $Ar^*$  are 9.491 Å (Ph- $DTP^{*+}-ArI$ ), 13.905 Å (TPA- $DTP^{*+}-ArI$ ) and 4.621 Å ( $Ar^*$ ), respectively. The solvent reorganization energy can be calculated by

$$\lambda_0 = 95 \left( \frac{1}{2r_{DTP^{*+}-ArI}} + \frac{1}{2r_{Ar^*}} - \frac{1}{r_{DTP^{*+}-ArI} + r_{Ar^*}} \right)$$

$$\lambda_0 (Ph-DTP) = 8.55 \text{ kcal/mol, and } \lambda_0 (TPA-DTP) = 8.57 \text{ kcal/mol}$$

$$\Delta G_0^\ddagger = \frac{\lambda_0 + D_B}{4}$$

$D_B$  is the bond dissociation energy of  $DTP^{*+}-ArI$  with the value of 7.5 kcal/mol for Ph-DTP and 6.98 kcal/mol for TPA-DTP.

Then  $\Delta G_0^\ddagger$  (Ph-DTP) is calculated to be 4.013 kcal/mol, and  $\Delta G_0^\ddagger$  (TPA-DTP) is 3.89 kcal/mol.

$\Delta_r G^\theta$  is the calculated reaction free energy, where  $\Delta_r G^\theta$  (Ph-DTP) = -45.66 kcal/mol and  $\Delta_r G^\theta$  (TPA-DTP) = -29.08 kcal/mol.

$$\Delta G^\ddagger = \Delta G_0^\ddagger \left( 1 + \frac{\Delta_r G^\theta}{4\Delta G_0^\ddagger} \right)^2$$

$$\Delta G^\ddagger (Ph-DTP) = 13.65 \text{ kcal/mol, and } \Delta G^\ddagger (TPA-DTP) = 2.94 \text{ kcal/mol}$$

$$\mu = \frac{M_{DTP^{*+}-ArI} M_{Ar^*}}{M_{DTP^{*+}-ArI} + M_{Ar^*}}$$

$\mu$  (Ph-DTP) = 111.76 g mol<sup>-1</sup>, and  $\mu$  (TPA-DTP) = 117.84 g mol<sup>-1</sup>

$$Z = N_A \sqrt{\frac{8\pi RT}{\mu}} (r_{\text{DTP}^{\bullet+}\text{-ArI}} + r_{\text{Ar}\cdot})^2$$

$Z$  (Ph-DTP) =  $8.95 \times 10^{11} \text{ M}^{-1}\text{s}^{-1}$ ,  $Z$  (TPA-DTP) =  $1.5 \times 10^{12} \text{ M}^{-1}\text{s}^{-1}$

Calculation for the concentration of DTP<sup>•+</sup>-ArI:

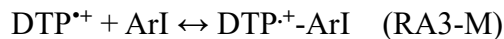

Reaction equilibrium constant  $k_f$  of RA3-M:

$$k_f = e^{-\frac{\Delta_r G^\theta(\text{RA3-M})}{RT}} = \frac{[\text{DTP}^{\bullet+}\text{-ArI}]}{[\text{DTP}^{\bullet+}][\text{ArI}]}$$

$\Delta_r G^\theta$  is the DFT calculated reaction free energy of RA3-M, where  $\Delta_r G^\theta(\text{Ph-DTP}) = 13.46 \text{ kcal/mol}$ , and  $\Delta_r G^\theta(\text{TPA-DTP}) = 4.88 \text{ kcal/mol}$ .

$$k_f(\text{Ph-DTP}) = \exp(-\Delta_r G^\theta(\text{RA3-M})/RT) = 1.36 \times 10^{-10}, k_f(\text{TPA-DTP}) = 2.65 \times 10^{-4}$$

$$[\text{Ph-DTP}^{\bullet+}\text{-ArI}] = k_f [\text{Ph-DTP}^{\bullet+}][\text{ArI}] = 4.6 \times 10^{-18} \text{ M}$$

$$[\text{TPA-DTP}^{\bullet+}\text{-ArI}] = k_f [\text{TPA-DTP}^{\bullet+}][\text{ArI}] = 8.97 \times 10^{-12} \text{ M}$$

$$k_{A3} = Z \exp\left(-\frac{\Delta G^\ddagger}{RT}\right)$$

$$k_{A3}(\text{Ph-DTP}) = 88.16 \text{ M}^{-1}\text{s}^{-1}, k_{A3}(\text{TPA-DTP}) = 1.05 \times 10^{10} \text{ M}^{-1}\text{s}^{-1}$$

$$R_{A3} = k_{A3} [\text{DTP}^{\bullet+}\text{-ArI}][\text{Ar}\cdot]$$

$$R_{A3}(\text{Ph-DTP}) = 1.87 \times 10^{-23} \text{ Ms}^{-1}, R_{A3}(\text{TPA-DTP}) = 4.35 \times 10^{-9} \text{ Ms}^{-1}$$

$$R/R_t(\text{Ph-DTP}) = 8.9 \times 10^{-16}, R/R_t(\text{TPA-DTP}) = 0.21$$

#### Path A4 – DET deactivation

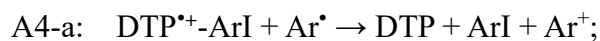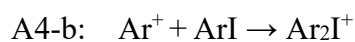

$\lambda_0$ ,  $D_B$ ,  $\Delta G_0^\ddagger$ ,  $Z$  and  $\mu$  are the same as the values shown in path A3.  $\Delta_r G^\theta$  is the calculated reaction free energy, where  $\Delta_r G^\theta(\text{Ph-DTP})$  is  $-8.0 \text{ kcal/mol}$  and  $\Delta_r G^\theta(\text{TPA-DTP})$  is  $8.58 \text{ kcal/mol}$ .

$$\Delta G^\ddagger = \Delta G_0^\ddagger \left(1 + \frac{\Delta_r G^\theta}{4\Delta G_0^\ddagger}\right)^2$$

$$\Delta G^\ddagger(\text{Ph-DTP}) = 1.01 \text{ kcal/mol}, \text{ and } \Delta G^\ddagger(\text{TPA-DTP}) = 9.36 \text{ kcal/mol}$$

$$k_{A4} = Z \exp\left(-\frac{\Delta G^\ddagger}{RT}\right)$$

$$k_{A4} (\text{Ph-DTP}) = 1.63 \times 10^{11} \text{ M}^{-1}\text{s}^{-1} \text{ and } k_{A4} (\text{TPA-DTP}) = 2.06 \times 10^5 \text{ M}^{-1}\text{s}^{-1}$$

$$R_{A4} = k_{A4} [\text{DTP}^{\bullet+}\text{-ArI}][\text{Ar}^\bullet]$$

$$R_{A4} (\text{Ph-DTP}) = 3.46 \times 10^{-14} \text{ Ms}^{-1} \text{ and } R_{A4} (\text{TPA-DTP}) = 8.5 \times 10^{-14} \text{ Ms}^{-1}$$

$$R/R_t (\text{Ph-DTP}) = 1.65 \times 10^{-6}, \text{ and } R/R_t (\text{TPA-DTP}) = 4.05 \times 10^{-6}$$

### Path A5 – OSET-III deactivation

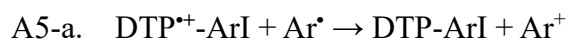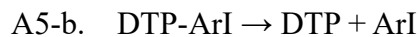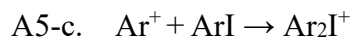

In step A5-a,  $\Delta_r G^\theta$  is the calculated reaction free energy, where  $\Delta_r G^\theta(\text{Ph-DTP})$  is  $-3.86$  kcal/mol and  $\Delta_r G^\theta(\text{TPA-DTP})$  is  $12.2$  kcal/mol.  $\lambda_0$ ,  $Z$  and  $\mu$  are the same as the values shown in paths A3 and A4.

$$\Delta G_0^\ddagger = \frac{\lambda_0}{4}$$

$$\Delta G_0^\ddagger (\text{Ph-DTP}) = 2.14 \text{ kcal/mol and } \Delta G_0^\ddagger (\text{TPA-DTP}) = 2.14 \text{ kcal/mol}$$

$$\Delta G^\ddagger = \Delta G_0^\ddagger \left(1 + \frac{\Delta_r G^\theta}{4\Delta G_0^\ddagger}\right)^2$$

$$\Delta G^\ddagger (\text{Ph-DTP}) = 0.64 \text{ kcal/mol and } \Delta G^\ddagger (\text{TPA-DTP}) = 12.58 \text{ kcal/mol}$$

$$k_{A5} = Z \exp\left(-\frac{\Delta G^\ddagger}{RT}\right)$$

$$k_{A5} (\text{Ph-DTP}) = 3.04 \times 10^{11} \text{ M}^{-1}\text{s}^{-1} \text{ and } k_{A5} (\text{TPA-DTP}) = 8.99 \times 10^2 \text{ M}^{-1}\text{s}^{-1}$$

$$R_{A5} = k_{A5} [\text{DTP}^{\bullet+}\text{-ArI}][\text{Ar}^\bullet]$$

$$R_{A5} (\text{Ph-DTP}) = 6.46 \times 10^{-14} \text{ Ms}^{-1}, \text{ and } R_{A5} (\text{TPA-DTP}) = 3.73 \times 10^{-16} \text{ Ms}^{-1}$$

$$R/R_t (\text{Ph-DTP}) = 3.08 \times 10^{-6} \text{ and } R/R_t (\text{TPA-DTP}) = 1.77 \times 10^{-8}$$

### Path A6 – AET deactivation

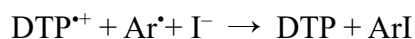

$\Delta G_0^\ddagger$  is the same as the one shown in path Act-2, with the value of 8.69 kcal/mol for Ph-DTP and 8.77 kcal/mol for TPA-DTP.  $\Delta_r G^\theta$  is the calculated reaction free energy, where  $\Delta_r G^\theta(\text{Ph-DTP}) = -57.49$  kcal/mol and  $\Delta_r G^\theta(\text{TPA-DTP}) = -49.5$  kcal/mol.

$$\Delta G^\ddagger = \Delta G_0^\ddagger \left( 1 + \frac{\Delta_r G^\theta - D_p}{4\Delta G_0^\ddagger} \right)^2$$

$$\Delta G^\ddagger (\text{Ph-DTP}) = 4.17 \text{ kcal/mol}, \Delta G^\ddagger (\text{TPA-DTP}) = 1.77 \text{ kcal/mol}.$$

$$Z = N_A^2 8\pi^2 \sqrt{\frac{2RT}{\pi}} \left[ \left( \frac{m_A + m_B}{m_A m_B} \right)^{\frac{1}{2}} + \left( \frac{m_B + m_C}{m_B m_C} \right)^{\frac{1}{2}} \right] d_{A \leftrightarrow B}^2 d_{B \leftrightarrow C}^2 \delta$$

Here, we define A = DTP<sup>+</sup>, B = Ar<sup>+</sup>, and C = I<sup>-</sup> for the calculation of Z.

$$Z (\text{Ph-DTP}) = (6.022 \times 10^{23} \text{ mol}^{-1})^2 \times 8 \times 3.14^2 \times (2 \times 8.314 \text{ J mol}^{-1} \text{ K}^{-1} \times 298.15 \text{ K} / 3.14)^{1/2} \times \{ [(0.44 \text{ kg mol}^{-1} + 0.133 \text{ kg mol}^{-1}) / (0.44 \text{ kg mol}^{-1} \times 0.133 \text{ kg mol}^{-1})]^{1/2} + [(0.133 \text{ kg mol}^{-1} + 0.127 \text{ kg mol}^{-1}) / (0.133 \text{ kg mol}^{-1} \times 0.127 \text{ kg mol}^{-1})]^{1/2} \} \times (14.118 \text{ \AA})^2 \times (6.601 \text{ \AA})^2 \times 0.3 \text{ \AA} = 2.09 \times 10^{11} \text{ M}^{-2} \text{ s}^{-1}$$

$$Z (\text{TPA-DTP}) = (6.022 \times 10^{23} \text{ mol}^{-1})^2 \times 8 \times 3.14^2 \times (2 \times 8.314 \text{ J mol}^{-1} \text{ K}^{-1} \times 298.15 \text{ K} / 3.14)^{1/2} \times \{ [(0.774 \text{ kg mol}^{-1} + 0.133 \text{ kg mol}^{-1}) / (0.774 \text{ kg mol}^{-1} \times 0.133 \text{ kg mol}^{-1})]^{1/2} + [(0.133 \text{ kg mol}^{-1} + 0.127 \text{ kg mol}^{-1}) / (0.133 \text{ kg mol}^{-1} \times 0.127 \text{ kg mol}^{-1})]^{1/2} \} \times (18.554 \text{ \AA})^2 \times (6.601 \text{ \AA})^2 \times 0.3 \text{ \AA} = 3.52 \times 10^{11} \text{ M}^{-2} \text{ s}^{-1}$$

$$k_{A6} = Z \exp \left( - \frac{\Delta G^\ddagger}{RT} \right)$$

$$k_{A6} (\text{Ph-DTP}) = 1.83 \times 10^8 \text{ M}^{-2} \text{ s}^{-1}, k_{A6} (\text{TPA-DTP}) = 1.77 \times 10^{10} \text{ M}^{-2} \text{ s}^{-1}$$

$$R_{A6} = k_{A6} [\text{DTP}^+][\text{Ar}^+][\text{I}^-]$$

$$R_{A6} (\text{Ph-DTP}) = 2.86 \times 10^{-8} \text{ Ms}^{-1}, \text{ and } R_{A6} (\text{TPA-DTP}) = 2.77 \times 10^{-6} \text{ Ms}^{-1}$$

$$R/R_t (\text{Ph-DTP}) = 1.36 \text{ and } R/R_t (\text{TPA-DTP}) = 132$$

### Path A7 – OSET-II deactivation

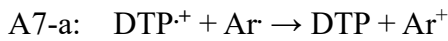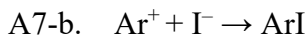

The reaction of path A7-a is the same as that of A2-a, such that it has the same values of  $\lambda_0$ ,  $\Delta G_0^\ddagger$ ,  $\Delta_r G^\theta$ ,  $\Delta G^\ddagger$ ,  $Z$ ,  $\mu$ ,  $k$ , and  $k_f$ . However, in path A7-b,  $R_{\text{overall}}$  is the final generation rate of ArI and it equals to  $k_{\text{diff}}[\text{Ar}^+][\text{I}^-]$ . Here, the lower concentration of I<sup>-</sup> (than [ArI] of path A2-b) leads to small

values of  $R_{\text{overall}}$  and  $R/R_t$  for this path.

$$R_{\text{overall}} (\text{Ph-DTP}) = 1.787 \times 10^{10} \text{ M}^{-1} \text{s}^{-1} \times 3.453 \times 10^{-13} \text{ M} \times 1.84 \times 10^{-4} \text{ M} = 1.14 \times 10^{-6} \text{ Ms}^{-1}$$

$$R_{\text{overall}} (\text{TPA-DTP}) = 1.787 \times 10^{10} \text{ M}^{-1} \text{s}^{-1} \times 4.55 \times 10^{-19} \text{ M} \times 1.84 \times 10^{-4} \text{ M} = 1.5 \times 10^{-12} \text{ Ms}^{-1}$$

$$R/R_t (\text{Ph-DTP}) = 1.14 \times 10^{-6} \text{ Ms}^{-1} / 2.1 \times 10^{-8} \text{ Ms}^{-1} = 54$$

$$R/R_t (\text{TPA-DTP}) = 1.5 \times 10^{-12} \text{ Ms}^{-1} / 2.1 \times 10^{-8} \text{ Ms}^{-1} = 7.14 \times 10^{-5}$$

### Path A8 – ISET deactivation

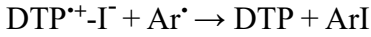

$D_B$  is the bond dissociation energy of  $\text{DTP}^{\bullet+} \cdot \text{I}^-$ , with values of 15.61 kcal/mol and 7.18 kcal/mol for Ph-DTP $^{\bullet+} \cdot \text{I}^-$  and TPA-DTP $^{\bullet+} \cdot \text{I}^-$ , respectively.  $\Delta_r G^\theta$  is the calculated reaction free energy; for the Ph-DTP case, it is -53.97 kcal/mol, and for the TPA-DTP case, it is -54.34 kcal/mol. The radii of  $\text{DTP}^{\bullet+} \cdot \text{I}^-$  and  $\text{Ar}^\bullet$  are 9.54 Å (Ph-DTP $^{\bullet+} \cdot \text{I}^-$ ), 14.018 Å (TPA-DTP $^{\bullet+} \cdot \text{I}^-$ ) and 4.621 Å ( $\text{Ar}^\bullet$ ).

$$\lambda_0 = 95 \left( \frac{1}{2r_{\text{DTP}^{\bullet+} \cdot \text{I}^-}} + \frac{1}{2r_{\text{Ar}^\bullet}} - \frac{1}{r_{\text{DTP}^{\bullet+} \cdot \text{I}^-} + r_{\text{Ar}^\bullet}} \right)$$

$$\lambda_0 (\text{Ph-DTP}) = 8.55 \text{ kcal/mol and } \lambda_0 (\text{TPA-DTP}) = 8.57 \text{ kcal/mol}$$

$$\Delta G_0^\ddagger = \frac{\lambda_0 + D_B}{4}$$

$$\Delta G_0^\ddagger (\text{Ph-DTP}) = 6.04 \text{ kcal/mol, and } \Delta G_0^\ddagger (\text{TPA-DTP}) = 3.94 \text{ kcal/mol}$$

$$\Delta G^\ddagger = \Delta G_0^\ddagger \left( 1 + \frac{\Delta_r G^\theta}{4\Delta G_0^\ddagger} \right)^2$$

$$\Delta G^\ddagger (\text{Ph-DTP}) = 9.2 \text{ kcal/mol and } \Delta G^\ddagger (\text{TPA-DTP}) = 23.61 \text{ kcal/mol}$$

$$\mu = \frac{M_{\text{DTP}^{\bullet+} \cdot \text{I}^-} M_{\text{Ar}^\bullet}}{M_{\text{DTP}^{\bullet+} \cdot \text{I}^-} + M_{\text{Ar}^\bullet}}$$

$$\mu (\text{Ph-DTP}) = 107.73 \text{ g mol}^{-1}, \mu (\text{TPA-DTP}) = 115.89 \text{ g mol}^{-1}$$

$$Z = N_A \sqrt{\frac{8\pi RT}{\mu}} (r_{\text{DTP}^{\bullet+} \cdot \text{I}^-} + r_{\text{Ar}^\bullet})^2$$

$$Z (\text{Ph-DTP}) = 9.18 \times 10^{11} \text{ M}^{-1} \text{s}^{-1} \text{ and } Z (\text{TPA-DTP}) = 1.534 \times 10^{12} \text{ M}^{-1} \text{s}^{-1}$$

$$k_{A8} = Z \exp \left( -\frac{\Delta G^\ddagger}{RT} \right)$$

$$k_{A8} (\text{Ph-DTP}) = 1.65 \times 10^5 \text{ M}^{-2} \text{s}^{-1}, k_{A8} (\text{TPA-DTP}) = 7.55 \times 10^{-6} \text{ M}^{-2} \text{s}^{-1}$$

The calculation of the concentration of  $\text{DTP}^{\bullet+} \cdot \text{I}^-$ :

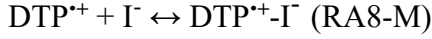

The reaction equilibrium constant  $k_f$  of RA8-M can be calculated by

$$k_f = e^{-\frac{\Delta_r G^\theta(\text{RA8-M})}{RT}} = \frac{[\text{DTP}^{\bullet+}\text{-I}^-]}{[\text{DTP}^{\bullet+}][\text{I}^-]}$$

where  $\Delta_r G^\theta(\text{RA8-M})$  is the DFT calculated free energy of reaction RA8-M; for the Ph-DTP case, it is  $-3.52$  kcal/mol, while for the TPA-DTP case, it is  $4.84$  kcal/mol.

$$k_f(\text{Ph-DTP}) = \exp(3.52 \text{ kcal mol}^{-1} / (1.987 \text{ cal mol}^{-1} \text{K}^{-1} \times 298.15 \text{ K})) = 380.58$$

$$k_f(\text{TPA-DTP}) = \exp(-4.84 \text{ kcal mol}^{-1} / (1.987 \text{ cal mol}^{-1} \text{K}^{-1} \times 298.15 \text{ K})) = 2.83 \times 10^{-4}$$

The concentration of  $\text{DTP}^{\bullet+}\text{-I}^-$  can be obtained by

$$[\text{Ph-DTP}^{\bullet+}\text{-I}^-] = k_f[\text{DTP}^{\bullet+}][\text{I}^-] = 1.3 \times 10^{-6} \text{ M}$$

$$[\text{TPA-DTP}^{\bullet+}\text{-I}^-] = 9.58 \times 10^{-13} \text{ M}$$

$$R_{A8} = k_{A8} [\text{DTP}^{\bullet+}\text{-I}^-][\text{Ar}^\bullet]$$

$$R_{A8}(\text{Ph-DTP}) = 9.9 \times 10^{-9} \text{ Ms}^{-1}, R_{A8}(\text{TPA-DTP}) = 3.34 \times 10^{-25} \text{ Ms}^{-1}$$

$$R/R_t(\text{Ph-DTP}) = 0.47, R/R_t(\text{TPA-DTP}) = 1.59 \times 10^{-17}$$

### Path A9 – DET deactivation

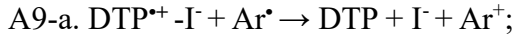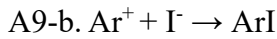

In path A9-a,  $\Delta_r G^\theta$  is the DFT calculated free energy, it is  $8.98$  kcal/mol for the Ph-DTP case and  $8.62$  kcal/mol for the TPA-DTP case.  $\lambda_0$ ,  $D_B$ ,  $\Delta G_0^\ddagger$ ,  $Z$  and  $\mu$  are the same as the values in path A8.

$$\Delta G^\ddagger = \Delta G_0^\ddagger \left( 1 + \frac{\Delta_r G^\theta}{4\Delta G_0^\ddagger} \right)^2$$

$$\Delta G^\ddagger(\text{Ph-DTP}) = 11.36 \text{ kcal/mol and } \Delta G^\ddagger(\text{TPA-DTP}) = 9.43 \text{ kcal/mol}$$

$$k_{A9} = Z \exp\left(-\frac{\Delta G^\ddagger}{RT}\right)$$

$$k_{A9}(\text{Ph-DTP}) = 4.32 \times 10^3 \text{ M}^{-1} \text{s}^{-1}, k_{A9}(\text{TPA-DTP}) = 1.87 \times 10^5 \text{ M}^{-1} \text{s}^{-1}$$

$$R_{A9} = k_{A9} [\text{DTP}^{\bullet+}\text{-I}^-][\text{Ar}^\bullet]$$

$$R_{A9}(\text{Ph-DTP}) = 2.59 \times 10^{-10} \text{ Ms}^{-1}, R_{A9}(\text{TPA-DTP}) = 8.28 \times 10^{-15} \text{ Ms}^{-1}$$

$$R/R_t(\text{Ph-DTP}) = 1.23 \times 10^{-2}, R/R_t(\text{TPA-DTP}) = 3.94 \times 10^{-7}$$

### Path A10 – OSET-III deactivation

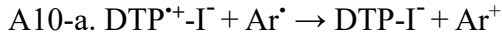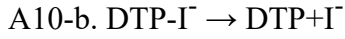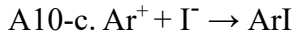

In path A10-a,  $\Delta_r G^\theta$  is the DFT calculated free energy; it is 12.69 kcal/mol for the Ph-DTP case and 13.36 kcal/mol for the TPA-DTP case.  $\lambda_0$ ,  $Z$  and  $\mu$  are the same as the values shown in paths A8 and A9.

$$\Delta G_0^\ddagger = \frac{\lambda_0}{4}$$

$$\Delta G_0^\ddagger (\text{Ph-DTP}) = 2.14 \text{ kcal/mol and } \Delta G_0^\ddagger (\text{TPA-DTP}) = 2.143 \text{ kcal/mol}$$

$$\Delta G^\ddagger = \Delta G_0^\ddagger \left( 1 + \frac{\Delta_r G^\theta}{4\Delta G_0^\ddagger} \right)^2$$

$$\Delta G^\ddagger (\text{Ph-DTP}) = 13.19 \text{ kcal/mol and } \Delta G^\ddagger (\text{TPA-DTP}) = 14.03 \text{ kcal/mol}$$

$$k_{\text{A10}} = Z \exp \left( -\frac{\Delta G^\ddagger}{RT} \right)$$

$$k_{\text{A10}} (\text{Ph-DTP}) = 196 \text{ M}^{-1}\text{s}^{-1}, k_{\text{A10}} (\text{TPA-DTP}) = 79.6 \text{ M}^{-1}\text{s}^{-1}$$

$$R_{\text{A10}} = k_{\text{A10}} [\text{DTP}^{\bullet+}\text{-I}^-][\text{Ar}^\bullet]$$

$$R_{\text{A10}} (\text{Ph-DTP}) = 1.18 \times 10^{-11} \text{ Ms}^{-1}, R_{\text{A10}} (\text{TPA-DTP}) = 3.52 \times 10^{-18} \text{ Ms}^{-1}$$

$$R/R_t (\text{Ph-DTP}) = 5.62 \times 10^{-4}, R/R_t (\text{TPA-DTP}) = 1.68 \times 10^{-10}$$

**Table S2.** Calculated activation barriers of each proposed deactivation path, A1-A10

| Path |         | $\Delta G^\ddagger$ (kcal/mol) | Path |         | $\Delta G^\ddagger$ (kcal/mol) |
|------|---------|--------------------------------|------|---------|--------------------------------|
| A1   | Ph-DTP  | 28.12                          | A6   | Ph-DTP  | 4.17                           |
|      | TPA-DTP | 15.47                          |      | TPA-DTP | 1.77                           |
| A2   | Ph-DTP  | 5.75                           | A7   | Ph-DTP  | 5.75                           |
|      | TPA-DTP | 14.16                          |      | TPA-DTP | 14.16                          |
| A3   | Ph-DTP  | 13.65                          | A8   | Ph-DTP  | 9.2                            |
|      | TPA-DTP | 2.94                           |      | TPA-DTP | 23.61                          |
| A4   | Ph-DTP  | 1.01                           | A9   | Ph-DTP  | 11.36                          |
|      | TPA-DTP | 9.36                           |      | TPA-DTP | 9.43                           |
| A5   | Ph-DTP  | 0.64                           | A10  | Ph-DTP  | 13.19                          |
|      | TPA-DTP | 12.58                          |      | TPA-DTP | 14.03                          |

**Note S2.3 Deactivation processes in the three-component PC–Ar<sub>2</sub>I<sup>+</sup>–EDB system****Path B**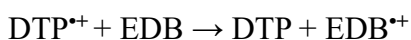

$\Delta_r G^0$  is the DFT calculated free energy; it is –6.44 kcal/mol for the Ph-DTP case and 1.55 kcal/mol for the TPA-DTP case. The calculated radii of DTP<sup>•+</sup> and EDB are 9.497 Å (Ph-DTP<sup>•+</sup>), 13.933 Å (TPA-DTP<sup>•+</sup>) and 6.907 Å (EDB).

$$\lambda_0 = 95 \left( \frac{1}{2r_{\text{DTP}^{\bullet+}}} + \frac{1}{2r_{\text{EDB}}} - \frac{1}{r_{\text{DTP}^{\bullet+}} + r_{\text{EDB}}} \right)$$

$$\lambda_0 (\text{Ph-DTP}) = 6.09 \text{ kcal/mol}$$

$$\lambda_0 (\text{TPA-DTP}) = 5.73 \text{ kcal/mol}$$

$$\Delta G_0^\ddagger = \frac{\lambda_0}{4}$$

$$\Delta G_0^\ddagger (\text{Ph-DTP}) = 1.52 \text{ kcal/mol}$$

$$\Delta G_0^\ddagger (\text{TPA-DTP}) = 1.43 \text{ kcal/mol}$$



$$\Delta G^\ddagger = \Delta G_0^\ddagger \left( 1 + \frac{\Delta_r G^\theta}{4\Delta G_0^\ddagger} \right)^2$$

$$\Delta G^\ddagger (\text{Ph-DTP}) = 0.005 \text{ kcal/mol}$$

$$\Delta G^\ddagger (\text{TPA-DTP}) = 2.31 \text{ kcal/mol}$$

$$\mu = \frac{M_{\text{DTP}^{*+}} M_{\text{EDB}}}{M_{\text{DTP}^{*+}} + M_{\text{EDB}}}$$

$$\mu (\text{Ph-DTP}) = 134.15 \text{ g mol}^{-1}$$

$$\mu (\text{TPA-DTP}) = 154.48 \text{ g mol}^{-1}$$

$$Z = N_A \sqrt{\frac{8\pi RT}{\mu}} (r_{\text{DTP}^{*+}} + r_{\text{EDB}})^2$$

$$Z (\text{Ph-DTP}) = 1.1 \times 10^{12} \text{ M}^{-1} \text{ s}^{-1}$$

$$Z (\text{TPA-DTP}) = 1.66 \times 10^{12} \text{ M}^{-1} \text{ s}^{-1}$$

$$k_B = Z \exp \left( -\frac{\Delta G^\ddagger}{RT} \right)$$

$$k_B (\text{Ph-DTP}) = 1.09 \times 10^{12} \text{ M}^{-1} \text{ s}^{-1}$$

$$k_B (\text{TPA-DTP}) = 3.36 \times 10^{10} \text{ M}^{-1} \text{ s}^{-1}$$

$$R_B = k_B [\text{DTP}^{*+}] [\text{EDB}]$$

The concentration of EDB is taken from experiment as 0.0513 M.

$$R_B (\text{Ph-DTP}) \text{ is calculated to be } 1.03 \times 10^6 \text{ Ms}^{-1}$$

$$R_B (\text{TPA-DTP}) \text{ is calculated to be } 3.17 \times 10^4 \text{ Ms}^{-1}$$

$$R/R_t (\text{Ph-DTP}) \text{ is calculated to be } 4.9 \times 10^{13}$$

$$R/R_t (\text{TPA-DTP}) \text{ is calculated to be } 1.51 \times 10^{12}$$

### Path B'-1

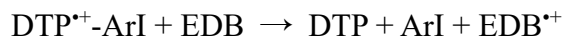

In this step,  $\Delta_r G^\theta$  is the calculated reaction free energy, where  $\Delta_r G^\theta$  (Ph-DTP case) is  $-19.9 \text{ kcal/mol}$  and  $\Delta_r G^\theta$  (TPA-DTP case) is  $-3.32 \text{ kcal/mol}$ .  $D_B$  is the bond dissociation energy of  $\text{DTP}^{*+} - \text{ArI}$  with the value of  $7.5 \text{ kcal/mol}$  for  $\text{Ph-DTP}^{*+} - \text{ArI}$  and  $6.98 \text{ kcal/mol}$  for  $\text{TPA-DTP}^{*+} - \text{ArI}$ . The calculated radii of  $\text{DTP}^{*+} - \text{ArI}$  are  $9.491 \text{ \AA}$  for  $\text{Ph-DTP}^{*+} - \text{ArI}$  and  $13.905 \text{ \AA}$  for  $\text{TPA-DTP}^{*+} - \text{ArI}$ .

$$\lambda_0 = 95 \left( \frac{1}{2r_{\text{DTP}^+-\text{ArI}}} + \frac{1}{2r_{\text{EDB}}} - \frac{1}{r_{\text{DTP}^+-\text{ArI}} + r_{\text{EDB}}} \right)$$

$$\lambda_0 (\text{Ph-DTP}) = 6.09 \text{ kcal/mol}$$

$$\lambda_0 (\text{TPA-DTP}) = 5.73 \text{ kcal/mol}$$

$$\Delta G_0^\ddagger = \frac{\lambda_0 + D_B}{4}$$

$$\Delta G_0^\ddagger (\text{Ph-DTP}) = 3.4 \text{ kcal/mol}$$

$$\Delta G_0^\ddagger (\text{TPA-DTP}) = 3.18 \text{ kcal/mol}$$

$$\Delta G^\ddagger = \Delta G_0^\ddagger \left( 1 + \frac{\Delta_r G^\theta}{4\Delta G_0^\ddagger} \right)^2$$

$$\Delta G^\ddagger (\text{Ph-DTP}) = 0.73 \text{ kcal/mol}$$

$$\Delta G^\ddagger (\text{TPA-DTP}) = 1.73 \text{ kcal/mol}$$

$$\mu = \frac{M_{\text{DTP}^+-\text{ArI}} M_{\text{EDB}}}{M_{\text{DTP}^+-\text{ArI}} + M_{\text{EDB}}}$$

$$\mu (\text{Ph-DTP}) = 151.29 \text{ g mol}^{-1}$$

$$\mu (\text{TPA-DTP}) = 162.64 \text{ g mol}^{-1}$$

$$Z = N_A \sqrt{\frac{8\pi RT}{\mu}} (r_{\text{DTP}^+-\text{ArI}} + r_{\text{EDB}})^2$$

$$Z (\text{Ph-DTP}) = 1.04 \times 10^{12} \text{ M}^{-1} \text{ s}^{-1}$$

$$Z (\text{TPA-DTP}) = 1.61 \times 10^{12} \text{ M}^{-1} \text{ s}^{-1}$$

$$k_{\text{B}^{\cdot-1}} = Z \exp \left( -\frac{\Delta G^\ddagger}{RT} \right)$$

$$k_{\text{B}^{\cdot-1}} (\text{Ph-DTP}) = 3.03 \times 10^{11} \text{ M}^{-1} \text{ s}^{-1}$$

$$k_{\text{B}^{\cdot-1}} (\text{TPA-DTP}) = 8.68 \times 10^{10} \text{ M}^{-1} \text{ s}^{-1}$$

$$R_{\text{B}^{\cdot-1}} = k_{\text{B}^{\cdot-1}} [\text{DTP}^+-\text{ArI}][\text{EDB}]$$

$$R_{\text{B}^{\cdot-1}} (\text{Ph-DTP}) = 7.15 \times 10^{-8} \text{ Ms}^{-1}$$

$$R_{\text{B}^{\cdot-1}} (\text{TPA-DTP}) = 3.99 \times 10^{-2} \text{ Ms}^{-1}$$

$$R/R_t (\text{Ph-DTP}) \text{ is calculated to be } 3.4$$

$$R/R_t (\text{TPA-DTP}) \text{ is calculated to be } 1.9 \times 10^6$$

## Path B'-2

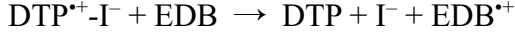

In this path,  $\Delta_r G^\theta$  is the DFT calculated free energy; it is  $-2.92$  kcal/mol for the Ph-DTP case and  $-3.29$  kcal/mol for the TPA-DTP case.  $D_B$  is the bond dissociation energy of  $\text{DTP}^{\bullet+}\text{-I}^-$ , where Ph- $\text{DTP}^{\bullet+}\text{-I}^-$  is  $15.61$  kcal/mol and TPA- $\text{DTP}^{\bullet+}\text{-I}^-$  is  $7.18$  kcal/mol. The calculated radii of  $\text{DTP}^{\bullet+}\text{-I}^-$  are  $9.54$  Å for Ph- $\text{DTP}^{\bullet+}\text{-I}^-$  and  $14.018$  Å for TPA- $\text{DTP}^{\bullet+}\text{-I}^-$ .

$$\lambda_0 = 95 \left( \frac{1}{2r_{\text{DTP}^{\bullet+}\text{-I}^-}} + \frac{1}{2r_{\text{EDB}}} - \frac{1}{r_{\text{DTP}^{\bullet+}\text{-I}^-} + r_{\text{EDB}}} \right)$$

$$\lambda_0 (\text{Ph-DTP}) = 6.08 \text{ kcal/mol}$$

$$\lambda_0 (\text{TPA-DTP}) = 5.73 \text{ kcal/mol}$$

$$\Delta G_0^\ddagger = \frac{\lambda_0 + D_B}{4}$$

$$\Delta G_0^\ddagger (\text{Ph-DTP}) = 5.42 \text{ kcal/mol}$$

$$\Delta G_0^\ddagger (\text{TPA-DTP}) = 3.23 \text{ kcal/mol}$$

$$\Delta G^\ddagger = \Delta G_0^\ddagger \left( 1 + \frac{\Delta_r G^\theta}{4\Delta G_0^\ddagger} \right)^2$$

$$\Delta G^\ddagger (\text{Ph-DTP}) = 4.06 \text{ kcal/mol}$$

$$\Delta G^\ddagger (\text{TPA-DTP}) = 1.79 \text{ kcal/mol}$$

$$\mu = \frac{M_{\text{DTP}^{\bullet+}\text{-I}^-} M_{\text{EDB}}}{M_{\text{DTP}^{\bullet+}\text{-I}^-} + M_{\text{EDB}}}$$

$$\mu (\text{Ph-DTP}) = 143.99 \text{ g mol}^{-1}$$

$$\mu (\text{TPA-DTP}) = 158.95 \text{ g mol}^{-1}$$

$$Z = N_A \sqrt{\frac{8\pi RT}{\mu}} (r_{\text{DTP}^{\bullet+}\text{-I}^-} + r_{\text{Ar}^\bullet})^2$$

$$Z (\text{Ph-DTP}) = 1.07 \times 10^{12} \text{ M}^{-1}\text{s}^{-1}$$

$$Z (\text{TPA-DTP}) = 1.65 \times 10^{12} \text{ M}^{-1}\text{s}^{-1}$$

$$k_{B^{\bullet-2}} = Z \exp \left( -\frac{\Delta G^\ddagger}{RT} \right)$$

$$k_{B^{\bullet-2}} (\text{Ph-DTP}) = 1.13 \times 10^9 \text{ M}^{-1}\text{s}^{-1}$$

$$k_{B^{\bullet-2}} (\text{TPA-DTP}) = 8.04 \times 10^{10} \text{ M}^{-1}\text{s}^{-1}$$

$$R_{B^{\bullet-2}} = k_{B^{\bullet-2}} [\text{DTP}^{\bullet+}\text{-I}^-][\text{EDB}]$$

$$R_{B^{\bullet-2}} (\text{Ph-DTP}) = 75.36 \text{ Ms}^{-1}$$

$$R_{B'-2}(\text{TPA-DTP}) = 3.95 \times 10^{-3} \text{ Ms}^{-1}$$

$$R/R_t(\text{Ph-DTP}) \text{ is calculated to be } 3.59 \times 10^9$$

$$R/R_t(\text{TPA-DTP}) \text{ is calculated to be } 1.88 \times 10^5$$

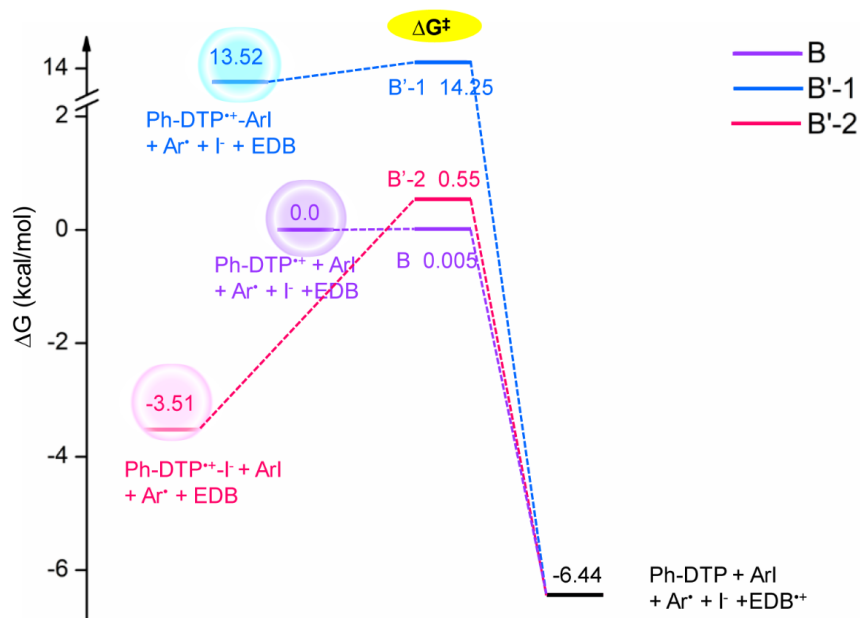

**Fig. S2** Energy profiles of Ph-DTP<sup>+</sup>/EDB/I-/ArI/Ar<sup>·</sup> following B, B'-1 and B'-2 deactivation paths.

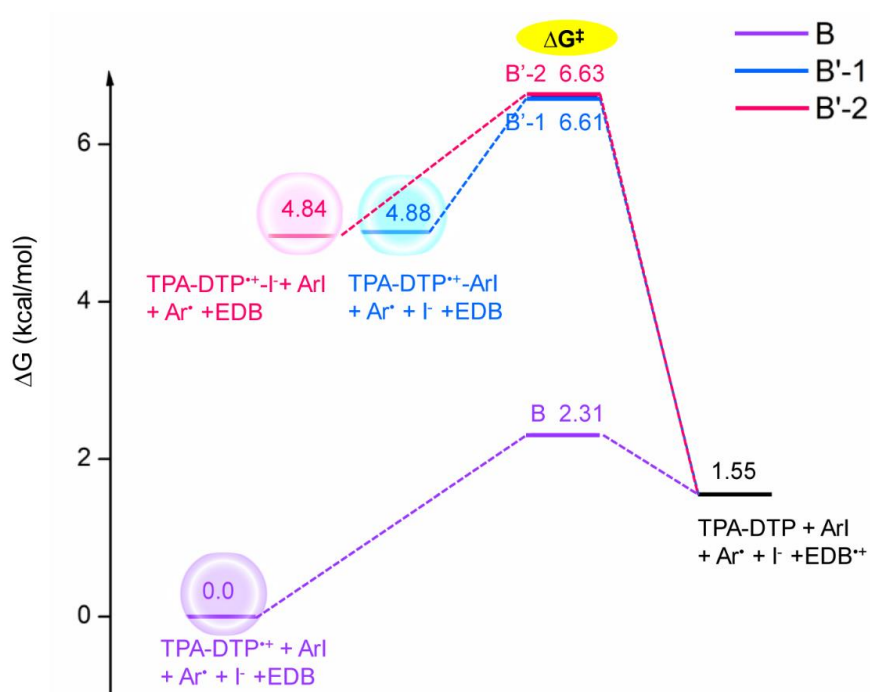

**Fig. S3** Energy profiles of TPA-DTP<sup>+</sup>/EDB/I-/ArI/Ar<sup>·</sup> following B, B'-1 and B'-2 deactivation paths.

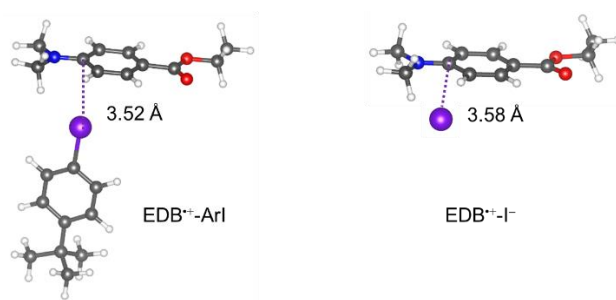

**Fig. S4** Stable structures of radical cation complexes of type  $\text{EDB}^{\bullet+}\text{-ArI}$  and  $\text{EDB}^{\bullet+}\text{-I}^-$ .

After paths B, B'-1 and B'-2 take place, 10 different deactivation reactions can potentially follow to regenerate EDB and  $\text{ArI}/\text{Ar}_2\text{I}^+$ , namely B1 to B10.

### Path B1

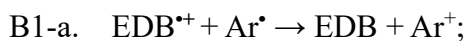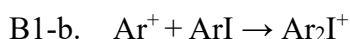

In path B1-a,  $\Delta_r G^\theta$  is the DFT calculated free energy with the value of 11.9 kcal/mol. The radius of  $\text{EDB}^{\bullet+}$  is 6.872 Å.

$$\lambda_0 = 95 \left( \frac{1}{2r_{\text{EDB}^{\bullet+}}} + \frac{1}{2r_{\text{Ar}^\bullet}} - \frac{1}{r_{\text{EDB}^{\bullet+}} + r_{\text{Ar}^\bullet}} \right)$$

$$= 8.93 \text{ kcal/mol}$$

$$\Delta G_0^\ddagger = \frac{\lambda_0}{4}$$

$$= 2.23 \text{ kcal/mol}$$

$$\Delta G^\ddagger = \Delta G_0^\ddagger \left( 1 + \frac{\Delta_r G^\theta}{4\Delta G_0^\ddagger} \right)^2$$

$$= 12.15 \text{ kcal/mol}$$

$$\mu = \frac{M_{\text{EDB}^{\bullet+}} M_{\text{Ar}^\bullet}}{M_{\text{EDB}^{\bullet+}} + M_{\text{Ar}^\bullet}}$$

$$= 78.74 \text{ g mol}^{-1}$$

$$Z = N_A \sqrt{\frac{8\pi RT}{\mu}} (r_{\text{EDB}^{\bullet+}} + r_{\text{Ar}^\bullet})^2$$

$$= 7.07 \times 10^{11} \text{ M}^{-1} \text{s}^{-1}$$

$$k_{B1} = Z \exp\left(-\frac{\Delta G^\ddagger}{RT}\right)$$

$$= 8.76 \times 10^2 \text{ M}^{-1} \text{ s}^{-1}$$

$$R_{B1} = k_{B1} [\text{EDB}^{*+}][\text{Ar}^*]$$

The concentration of  $\text{EDB}^{*+}$  cannot be directly detected in electrochemical measurements. Therefore, about 10% of termination is considered here, such that a low concentration of 0.00513 M is used for  $[\text{EDB}^{*+}]$ .

$$R_{B1} = 2.08 \times 10^{-7} \text{ Ms}^{-1}$$

$$R/R_t (\text{Ph-DTP}) = 10$$

## Path B2

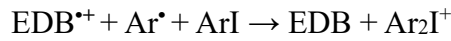

$$r_{\text{eff}} = \frac{(2r_{\text{Ar}_2\text{I}^+} - r_{\text{ArI}})r_{\text{ArI}}}{r_{\text{Ar}_2\text{I}^+}}$$

$$= 7.371 \text{ \AA}$$

$$\lambda_0 = 95 \left( \frac{1}{2r_{\text{EDB}^{*+}}} + \frac{1}{2r_{\text{eff}}} - \frac{1}{r_{\text{EDB}^{*+}} + r_{\text{eff}}} \right)$$

$$= 6.69 \text{ kcal/mol}$$

$\Delta_r G^\theta$  is the DFT calculated free energy with the value of  $-25.76 \text{ kcal/mol}$ , while  $D_B$  and  $D_p$  are the same as the ones shown in the Act-1 reaction.

$$\Delta G_0^\ddagger = \frac{\lambda_0 + (\sqrt{D_B} - \sqrt{D_p})^2}{4}$$

$$= 1.81 \text{ kcal/mol}$$

$$\Delta G^\ddagger = \Delta G_0^\ddagger \left( 1 + \frac{\Delta_r G^\theta - D_p}{4\Delta G_0^\ddagger} \right)^2$$

$$= 12.97 \text{ kcal/mol}$$

$$Z = N_A^2 8\pi^2 \sqrt{\frac{2RT}{\pi}} \left[ \left( \frac{m_A + m_B}{m_A m_B} \right)^{\frac{1}{2}} + \left( \frac{m_B + m_C}{m_B m_C} \right)^{\frac{1}{2}} \right] d_{A \leftrightarrow B}^2 d_{B \leftrightarrow C}^2 \delta$$

Here, we define  $A = \text{EDB}^{*+}$ ,  $B = \text{Ar}^*$ , and  $C = \text{ArI}$ , such that  $m_A = 0.193 \text{ kgmol}^{-1}$ ,  $m_B = 0.133 \text{ kgmol}^{-1}$

<sup>1</sup>, and  $m_C = 0.26 \text{ kgmol}^{-1}$ . With these values and their corresponding radii,  $Z$  can be obtained.

$$Z = 3.34 \times 10^{11} \text{ M}^{-2} \text{ s}^{-1}$$

$$k_{B2} = Z \exp\left(-\frac{\Delta G^\ddagger}{RT}\right)$$

$$= 1.04 \times 10^2 \text{ M}^{-2} \text{ s}^{-1}$$

$$R_{B2} = k_{B2} [\text{EDB}^{*+}][\text{Ar}^*][\text{ArI}]$$

$$= 4.54 \times 10^{-11} \text{ Ms}^{-1}$$

$$R/R_t = 2.16 \times 10^{-3}$$

### Path B3

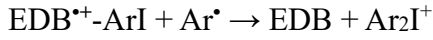

$\Delta_r G^\theta$  is the DFT calculated free energy with the value of  $-30.82 \text{ kcal/mol}$ , and  $D_B$  is the bond dissociation energy of  $\text{EDB}^{*+}\text{-ArI}$  with the value of  $3.3 \text{ kcal/mol}$ . The radius of  $\text{EDB}^{*+}\text{-ArI}$  is  $8.748 \text{ \AA}$ .

$$\lambda_0 = 95 \left( \frac{1}{2r_{\text{EDB}^{*+}\text{-ArI}}} + \frac{1}{2r_{\text{Ar}}} - \frac{1}{r_{\text{EDB}^{*+}\text{-ArI}} + r_{\text{Ar}}} \right)$$

$$= 8.6 \text{ kcal/mol}$$

$$\Delta G_0^\ddagger = \frac{\lambda_0 + D_B}{4}$$

$$= 2.975 \text{ kcal/mol}$$

$$\Delta G^\ddagger = \Delta G_0^\ddagger \left( 1 + \frac{\Delta_r G^\theta}{4\Delta G_0^\ddagger} \right)^2$$

$$= 7.52 \text{ kcal/mol}$$

$$\mu = \frac{M_{\text{EDB}^{*+}\text{-ArI}} M_{\text{Ar}^\bullet}}{M_{\text{EDB}^{*+}\text{-ArI}} + M_{\text{Ar}^\bullet}}$$

$$= 102.81 \text{ g mol}^{-1}$$

$$Z = N_A \sqrt{\frac{8\pi RT}{\mu}} (r_{\text{EDB}^{*+}\text{-ArI}} + r_{\text{Ar}^\bullet})^2$$

$$= 8.38 \times 10^{11} \text{ M}^{-1} \text{ s}^{-1}$$

$$k_{B3} = Z \exp\left(-\frac{\Delta G^\ddagger}{RT}\right)$$

$$= 2.57 \times 10^6 \text{ M}^{-1}\text{s}^{-1}$$

The calculation of the concentration of EDB<sup>•+</sup>-ArI:

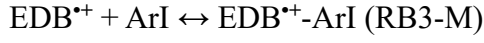

Reaction equilibrium constant  $k_f$  of RB3-M:

$$k_f = e^{-\frac{\Delta_r G^\theta(\text{RB3-M})}{RT}} = \frac{[\text{EDB}^{\bullet+}\text{-ArI}]}{[\text{EDB}^{\bullet+}][\text{ArI}]}$$

$\Delta_r G^\theta(\text{RB3-M})$  is the DFT calculated free energy with the value of 5.06 kcal/mol.

$$k_f = \exp(-5.06 \text{ kcal mol}^{-1} / (1.987 \text{ cal mol}^{-1} \text{K}^{-1} \times 298.15 \text{ K})) = 1.96 \times 10^{-4}$$

Then, the concentration of EDB<sup>•+</sup>-ArI can be obtained.

$$[\text{EDB}^{\bullet+}\text{-ArI}] = 1.85 \times 10^{-9} \text{ M}$$

$$R_{\text{B3}} = k_{\text{B3}} [\text{EDB}^{\bullet+}\text{-ArI}][\text{Ar}^{\bullet}]$$

$$= 2.2 \times 10^{-10} \text{ Ms}^{-1}$$

$$R/R_t = 0.01$$

#### Path B4

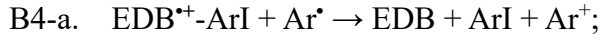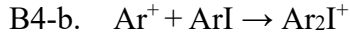

In path B4-a,  $\Delta_r G^\theta$  is the DFT calculated free energy with the value of 6.84 kcal/mol.  $\lambda_0$ ,  $D_B$ ,  $\Delta G_0^\ddagger$ ,  $Z$  and  $\mu$  are the same as the ones shown in path B3.

$$\Delta G^\ddagger = \Delta G_0^\ddagger \left( 1 + \frac{\Delta_r G^\theta}{4\Delta G_0^\ddagger} \right)^2$$

$$= 7.39 \text{ kcal/mol}$$

$$k_{\text{B4}} = Z \exp\left(-\frac{\Delta G^\ddagger}{RT}\right)$$

$$= 3.2 \times 10^6 \text{ M}^{-1}\text{s}^{-1}$$

$$R_{\text{B4}} = k_{\text{B4}} [\text{EDB}^{\bullet+}\text{-ArI}][\text{Ar}^{\bullet}]$$

$$= 2.74 \times 10^{-10} \text{ Ms}^{-1}$$

$$R/R_t = 1.3 \times 10^{-2}$$



### Path B5

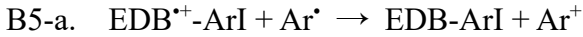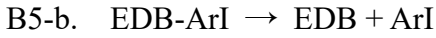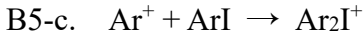

In reaction B5-a, the DFT calculated free energy  $\Delta_r G^\theta = 9.23$  kcal/mol.  $\lambda_0$ ,  $Z$  and  $\mu$  are the same as the ones shown in path B3.

$$\Delta G_0^\ddagger = \frac{\lambda_0}{4}$$

$$= 2.15 \text{ kcal/mol}$$

$$\Delta G^\ddagger = \Delta G_0^\ddagger \left( 1 + \frac{\Delta_r G^\theta}{4\Delta G_0^\ddagger} \right)^2$$

$$= 9.24 \text{ kcal/mol}$$

$$k_{\text{B5}} = Z \exp\left(-\frac{\Delta G^\ddagger}{RT}\right)$$

$$= 1.41 \times 10^5 \text{ M}^{-1}\text{s}^{-1}$$

$$R_{\text{B5}} = k_{\text{B5}} [\text{EDB}^{\bullet+}\text{-ArI}][\text{Ar}^{\bullet}]$$

$$= 1.21 \times 10^{-11} \text{ Ms}^{-1}$$

$$R/R_t = 5.76 \times 10^{-4}$$

### Path B6

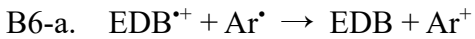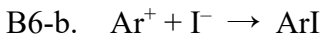

In reaction B6-a, all the relevant parameters are the same as the ones shown in path B1-a.

### Path B7

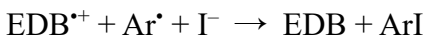

The DFT calculated free energy  $\Delta_r G^\theta = -51.06$  kcal/mol, while  $D_{\text{B}}$  and  $D_{\text{p}}$  are the same as the ones shown in the Act-2 reaction.  $r_{\text{eff}}$  is as shown in Table S1.

$$\lambda_0 = 95 \left( \frac{1}{2r_{\text{EDB}^{*+}}} + \frac{1}{2r_{\text{eff}}} - \frac{1}{r_{\text{EDB}^{*+}+r_{\text{eff}}}} \right)$$

$$= 12.05 \text{ kcal/mol}$$

$$G_0^\ddagger = \frac{\lambda_0 + (\sqrt{D_B} - \sqrt{D_P})^2}{4}$$

$$= 8.69 \text{ kcal/mol}$$

$$\Delta G^\ddagger = \Delta G_0^\ddagger \left( 1 + \frac{\Delta_r G^\theta - D_P}{4\Delta G_0^\ddagger} \right)^2$$

$$= 2.24 \text{ kcal/mol}$$

$$Z = N_A^2 8\pi^2 \sqrt{\frac{2RT}{\pi}} \left[ \left( \frac{m_A + m_B}{m_A m_B} \right)^{\frac{1}{2}} + \left( \frac{m_B + m_C}{m_B m_C} \right)^{\frac{1}{2}} \right] d_{A \leftrightarrow B}^2 d_{B \leftrightarrow C}^2 \delta$$

Here we define A = EDB<sup>\*+</sup>, B = Ar<sup>•</sup> and C = I<sup>-</sup>.

$$Z = 1.47 \times 10^{11} \text{ M}^{-2} \text{s}^{-1}$$

$$k_{B7} = Z \exp \left( -\frac{\Delta G^\ddagger}{RT} \right)$$

$$= 3.35 \times 10^9 \text{ M}^{-2} \text{s}^{-1}$$

$$R_{B7} = k_{B7} [\text{EDB}^{*+}][\text{Ar}^\bullet][\text{I}^-]$$

$$= 1.46 \times 10^{-4} \text{ Ms}^{-1}$$

$$R/R_t = 6.96 \times 10^3$$

## Path B8

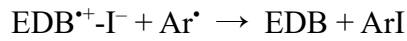

$\Delta_r G^\theta$  is the DFT calculated free energy with the value of -54.53 kcal/mol, and  $D_B$  is the bond dissociation energy of EDB<sup>\*+</sup>-I<sup>-</sup> with the value of 2.356 kcal/mol. The radius of EDB<sup>\*+</sup>-I<sup>-</sup> is 7.009 Å.

$$\lambda_0 = 95 \left( \frac{1}{2r_{\text{EDB}^{*+}\text{-I}^-}} + \frac{1}{2r_{\text{Ar}^\bullet}} - \frac{1}{r_{\text{EDB}^{*+}\text{-I}^-}+r_{\text{Ar}^\bullet}} \right)$$

$$= 8.89 \text{ kcal/mol}$$

$$\Delta G_0^\ddagger = \frac{\lambda_0 + D_B}{4}$$

$$= 2.81 \text{ kcal/mol}$$

$$\Delta G^\ddagger = \Delta G_0^\ddagger \left( 1 + \frac{\Delta_r G^\theta}{4\Delta G_0^\ddagger} \right)^2$$

$$= 41.68 \text{ kcal/mol}$$

$$\mu = \frac{M_{\text{EDB}^+\cdot\text{I}^-} M_{\text{Ar}\cdot}}{M_{\text{EDB}^+\cdot\text{I}^-} + M_{\text{Ar}\cdot}}$$

$$= 93.95 \text{ g mol}^{-1}$$

$$Z = N_A \sqrt{\frac{8\pi RT}{\mu}} (r_{\text{EDB}^+\cdot\text{I}^-} + r_{\text{Ar}\cdot})^2$$

$$= 6.63 \times 10^{11} \text{ M}^{-1}\text{s}^{-1}$$

$$k_{\text{B8}} = Z \exp\left(-\frac{\Delta G^\ddagger}{RT}\right)$$

$$= 1.85 \times 10^{-19} \text{ M}^{-1}\text{s}^{-1}$$

The calculation of the concentration of  $\text{EDB}^{*\cdot}\text{-I}^-$ :

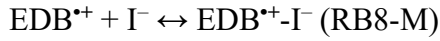

Reaction equilibrium constant  $k_f$  of RB3-M:

$$k_f = e^{-\frac{\Delta_r G^\theta(\text{RB8-M})}{RT}} = \frac{[\text{EDB}^{*\cdot}\text{-I}^-]}{[\text{EDB}^{*\cdot}][\text{I}^-]}$$

$\Delta_r G^\theta(\text{RB8-M})$  is the DFT calculated free energy with the value of 3.47 kcal/mol.

$$k_f = \exp(-3.47 \text{ kcal mol}^{-1} / (1.987 \text{ cal mol}^{-1}\text{K}^{-1} \times 298.15 \text{ K})) = 2.85 \times 10^{-3}$$

Then the concentration of  $\text{EDB}^{*\cdot}\text{-I}^-$  can be obtained.

$$[\text{EDB}^{*\cdot}\text{-I}^-] = 2.85 \times 10^{-3} \times 0.00513 \times 1.84 \times 10^{-4} = 2.69 \times 10^{-9} \text{ M}$$

$$R_{\text{B8}} = k_{\text{B8}} [\text{EDB}^{*\cdot}\text{-I}^-][\text{Ar}\cdot]$$

$$= 2.3 \times 10^{-35} \text{ Ms}^{-1}$$

$$R/R_t = 1.1 \times 10^{-27}$$

## Path B9

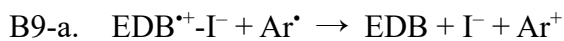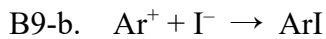

In path B9-a,  $\Delta_r G^\theta$  is the DFT calculated free energy with the value of 8.43 kcal/mol, while  $\lambda_0$ ,  $D_B$ ,

$\Delta G_0^\ddagger$ ,  $Z$  and  $\mu$  are the same as the ones shown in path B8.

$$\Delta G^\ddagger = \Delta G_0^\ddagger \left( 1 + \frac{\Delta_r G^\theta}{4\Delta G_0^\ddagger} \right)^2$$

$$= 8.61 \text{ kcal/mol}$$

$$k_{B9} = Z \exp \left( -\frac{\Delta G^\ddagger}{RT} \right)$$

$$= 3.26 \times 10^5 \text{ M}^{-1} \text{ s}^{-1}$$

$$R_{B9} = k_{B9} [\text{EDB}^{\bullet+} \text{-I}^-][\text{Ar}^\bullet]$$

$$= 4.05 \times 10^{-11} \text{ Ms}^{-1}$$

$$R/R_t = 1.93 \times 10^{-3}$$

### Path B10

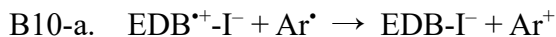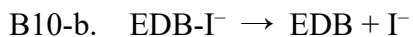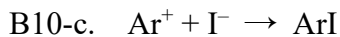

In reaction B10-a, the DFT calculated free energy  $\Delta_r G^\theta = 9.604 \text{ kcal/mol}$ .  $\lambda_0$ ,  $Z$  and  $\mu$  are the same as the ones shown in path B8.

$$\Delta G_0^\ddagger = \frac{\lambda_0}{4}$$

$$= 2.22 \text{ kcal/mol}$$

$$\Delta G^\ddagger = \Delta G_0^\ddagger \left( 1 + \frac{\Delta_r G^\theta}{4\Delta G_0^\ddagger} \right)^2$$

$$= 9.62 \text{ kcal/mol}$$

$$k_{B10} = Z \exp \left( -\frac{\Delta G^\ddagger}{RT} \right)$$

$$= 5.88 \times 10^4 \text{ M}^{-1} \text{ s}^{-1}$$

$$R_{B10} = k_{B10} [\text{EDB}^+ \text{-ArI}][\text{Ar}^\bullet]$$

$$= 7.31 \times 10^{-12} \text{ Ms}^{-1}$$

$$R/R_t = 3.48 \times 10^{-4}$$

### Path C

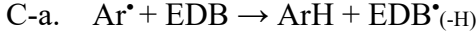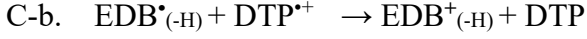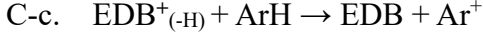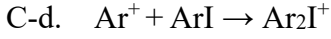

In reaction C-a, the DFT calculated free energy  $\Delta_r G^\theta = -3.01$  kcal/mol, while  $D_B$  is the bond dissociation energy of  $\text{EDB} \rightarrow \text{EDB}^{\bullet(-\text{H})} + \text{H}^\bullet$  with the value of 120.05 kcal/mol.  $\mu$  is the same as the one shown in path B1.

$$\lambda_0 = 95 \left( \frac{1}{2r_{\text{EDB}}} + \frac{1}{2r_{\text{Ar}^\bullet}} - \frac{1}{r_{\text{EDB}} + r_{\text{Ar}^\bullet}} \right)$$

$$= 8.92 \text{ kcal/mol}$$

$$\Delta G_0^\ddagger = \frac{\lambda_0 + D_B}{4}$$

$$= 32.24 \text{ kcal/mol}$$

$$\Delta G^\ddagger = \Delta G_0^\ddagger \left( 1 + \frac{\Delta_r G^\theta}{4\Delta G_0^\ddagger} \right)^2$$

$$= 30.75 \text{ kcal/mol}$$

$$Z = 7.12 \times 10^{11} \text{ M}^{-1}\text{s}^{-1}$$

$$k_{\text{C-a}} = Z \exp \left( -\frac{\Delta G^\ddagger}{RT} \right)$$

$$= 2.04 \times 10^{-11} \text{ M}^{-1}\text{s}^{-1}$$

$$R_{\text{C-a}} = k_{\text{C-a}} [\text{EDB}][\text{Ar}^\bullet]$$

$$= 4.83 \times 10^{-20} \text{ Ms}^{-1}$$

$$R/R_t = 2.3 \times 10^{-12}$$

In reaction C-b, the DFT calculated free energy  $\Delta_r G^\theta$  is 2.34 kcal/mol for the Ph-DTP case and 10.33 kcal/mol for the TPA-DTP case. The radius of  $\text{EDB}^{\bullet(-\text{H})}$  is 7 Å.

$$\lambda_0 = 95 \left( \frac{1}{2r_{\text{EDB}^{\bullet(-\text{H})}}} + \frac{1}{2r_{\text{DTP}^{\bullet+}}} - \frac{1}{r_{\text{EDB}^{\bullet(-\text{H})}} + r_{\text{DTP}^{\bullet+}}} \right)$$

$$\lambda_0 (\text{Ph-DTP}) = 6.03 \text{ kcal/mol}$$

$$\lambda_0 (\text{TPA-DTP}) = 5.66 \text{ kcal/mol}$$

$$\Delta G_0^\ddagger = \frac{\lambda_0}{4}$$

$$\Delta G_0^\ddagger (\text{Ph-DTP}) = 1.51 \text{ kcal/mol}$$

$$\Delta G_0^\ddagger (\text{TPA-DTP}) = 1.415 \text{ kcal/mol}$$

$$\Delta G^\ddagger = \Delta G_0^\ddagger \left( 1 + \frac{\Delta_r G^\theta}{4\Delta G_0^\ddagger} \right)^2$$

$$\Delta G^\ddagger (\text{Ph-DTP}) = 2.91 \text{ kcal/mol}$$

$$\Delta G^\ddagger (\text{TPA-DTP}) = 11.29 \text{ kcal/mol}$$

$$\mu = \frac{M_{\text{EDB}^\bullet(-\text{H})} M_{\text{DTP}^{\bullet+}}}{M_{\text{EDB}^\bullet(-\text{H})} + M_{\text{DTP}^{\bullet+}}}$$

$$\mu (\text{Ph-DTP}) = 133.67 \text{ g mol}^{-1}$$

$$\mu (\text{TPA-DTP}) = 153.84 \text{ g mol}^{-1}$$

$$Z = N_A \sqrt{\frac{8\pi RT}{\mu}} (r_{\text{EDB}^\bullet(-\text{H})} + r_{\text{DTP}^{\bullet+}})^2$$

$$Z (\text{Ph-DTP}) = 1.12 \times 10^{12} \text{ M}^{-1} \text{s}^{-1}$$

$$Z (\text{TPA-DTP}) = 1.68 \times 10^{12} \text{ M}^{-1} \text{s}^{-1}$$

$$k_{\text{C-b}} = Z \exp\left(-\frac{\Delta G^\ddagger}{RT}\right)$$

$$k_{\text{C-b}} (\text{Ph-DTP}) = 8.24 \times 10^9 \text{ M}^{-1} \text{s}^{-1}$$

$$k_{\text{C-b}} (\text{TPA-DTP}) = 8.89 \times 10^3 \text{ M}^{-1} \text{s}^{-1}$$

$$R_{\text{C-b}} = k_{\text{C-b}} [\text{EDB}^\bullet(-\text{H})][\text{DTP}^{\bullet+}]$$

$$R_{\text{C-b}} (\text{Ph-DTP}) = 7.78 \times 10^2 \text{ Ms}^{-1}$$

$$R_{\text{C-b}} (\text{TPA-DTP}) = 8.39 \times 10^{-4} \text{ Ms}^{-1}$$

$$R/R_t (\text{Ph-DTP}) = 3.7 \times 10^{10}$$

$$R/R_t (\text{TPA-DTP}) = 4 \times 10^4$$

From observing the various reaction steps involved in path C, the high bond dissociation energy of EDB appears to render a challenge towards their feasibility. Besides, the calculated high activation barriers indicate that path C is in fact difficult to carry out.

**Table S3.** Calculated activation barriers of each proposed deactivation path, B, B' and B1–B10

| Path |         | $\Delta G_1^\ddagger$ (kcal/mol) | Path | $\Delta G_2^\ddagger$ (kcal/mol) |
|------|---------|----------------------------------|------|----------------------------------|
| B    | Ph-DTP  | 0.005                            | B1   | 12.15                            |
|      | TPA-DTP | 2.31                             | B2   | 12.97                            |
| B'-1 | Ph-DTP  | 0.73                             | B3   | 7.52                             |
|      | TPA-DTP | 1.73                             | B4   | 7.39                             |
| B'-2 | Ph-DTP  | 4.06                             | B5   | 9.24                             |
|      | TPA-DTP | 1.79                             | B6   | 12.15                            |
|      |         |                                  | B7   | 2.24                             |
|      |         |                                  | B8   | 41.68                            |
|      |         |                                  | B9   | 8.61                             |
|      |         |                                  | B10  | 9.62                             |

**Note S2.4 Deactivation processes in the PC–EDB system**

Experimental studies on the polymerization kinetics have found inconspicuous photolysis conversion in the DTPs-EDB system, while its electron transfer quantum yield of about 0.25<sup>17</sup> claims that back electron transfer would occur during the interaction. This means that although the Act-3 process has a rather high activation barrier (Table 1), the DTP<sup>•-</sup> and EDB<sup>•+</sup> species still have a chance to be generated. Herein, the deactivation mechanisms involved among the co-existing components DTP<sup>•-</sup>/EDB<sup>•+</sup>/Ar<sub>2</sub>I<sup>+</sup> are investigated. Three possible mechanisms can be found, as denoted by paths D, D' and E. The relevant activation energy and rate constant in each path are shown in Table S4 and Table S5, and their energy profiles are shown in Fig. S5-6.

**Path D**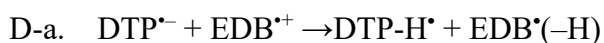

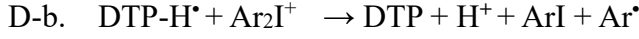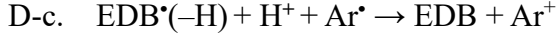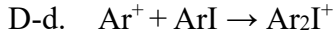

In reaction D-a, the DFT calculated free energy  $\Delta_r G^\theta$  is 14.13 kcal/mol for the Ph-DTP case and 37.26 kcal/mol for the TPA-DTP case.  $D_B$  is the bond dissociation energy of  $\text{EDB}^{\bullet+} \rightarrow \text{EDB}_{(-\text{H})}^\bullet + \text{H}^+$  with the value of 177.08 kcal/mol. Such a high value means that it is hard to obtain  $\text{EDB}_{(-\text{H})}^\bullet$  without the intervention of a strong external stimulus.

The radii of  $\text{DTP}^{\bullet-}$  are 9.591 and 14.06 Å for Ph-DTP $^{\bullet-}$  and TPA-DTP $^{\bullet-}$ , respectively.

$$\lambda_0 = 95 \left( \frac{1}{2r_{\text{EDB}^{\bullet+}}} + \frac{1}{2r_{\text{DTP}^{\bullet-}}} - \frac{1}{r_{\text{EDB}^{\bullet+}} + r_{\text{DTP}^{\bullet-}}} \right)$$

$$\lambda_0 (\text{Ph-DTP}) = 6.09 \text{ kcal/mol}$$

$$\lambda_0 (\text{TPA-DTP}) = 5.75 \text{ kcal/mol}$$

$$\Delta G_0^\ddagger = \frac{\lambda_0 + D_B}{4}$$

$$\Delta G_0^\ddagger (\text{Ph-DTP}) = 45.79 \text{ kcal/mol}$$

$$\Delta G_0^\ddagger (\text{TPA-DTP}) = 45.71 \text{ kcal/mol}$$

$$\Delta G^\ddagger = \Delta G_0^\ddagger \left( 1 + \frac{\Delta_r G^\theta}{4\Delta G_0^\ddagger} \right)^2$$

$$\Delta G^\ddagger (\text{Ph-DTP}) = 53.13 \text{ kcal/mol}$$

$$\Delta G^\ddagger (\text{TPA-DTP}) = 66.24 \text{ kcal/mol}$$

$\mu$  is the same as the one shown in path B.

$$Z = N_A \sqrt{\frac{8\pi RT}{\mu}} (r_{\text{EDB}^{\bullet+}} + r_{\text{DTP}^{\bullet-}})^2$$

$$Z (\text{Ph-DTP}) = 1.11 \times 10^{12} \text{ M}^{-1}\text{s}^{-1}$$

$$Z (\text{TPA-DTP}) = 1.68 \times 10^{12} \text{ M}^{-1}\text{s}^{-1}$$

$$k_{\text{D-a}} = Z \exp\left(-\frac{\Delta G^\ddagger}{RT}\right)$$

$$K_{\text{D-a}} (\text{Ph-DTP}) = 1.25 \times 10^{-27} \text{ M}^{-1}\text{s}^{-1}$$

$$K_{\text{D-a}} (\text{TPA-DTP}) = 4.64 \times 10^{-37} \text{ M}^{-1}\text{s}^{-1}$$

$$R_{\text{D-a}} = k_{\text{D-a}} [\text{EDB}^{\bullet+}][\text{DTP}^{\bullet-}]$$



Here, the concentration of  $\text{DTP}^{\bullet-}$  is the same as that of  $\text{DTP}^{\bullet+}$ .

$$R_{\text{D-a}} (\text{Ph-DTP}) = 1.18 \times 10^{-34} \text{ Ms}^{-1}$$

$$R_{\text{D-a}} (\text{TPA-DTP}) = 4.38 \times 10^{-44} \text{ Ms}^{-1}$$

$$R/R_t (\text{Ph-DTP}) = 5.62 \times 10^{-27}$$

$$R/R_t (\text{TPA-DTP}) = 2.09 \times 10^{-36}$$

In reaction D-b, the DFT calculated free energy  $\Delta_r G^\theta$  is 108.58 kcal/mol for the Ph-DTP case and 84.19 kcal/mol for the TPA-DTP case.  $D_B$  is the bond dissociation energy with values of 58.58 kcal/mol (Ph-DTP- $\text{H}^\bullet$ ), 17.22 kcal/mol (TPA-DTP- $\text{H}^\bullet$ ) and 2.75 kcal/mol ( $\text{Ar}_2\text{I}^+$ ). The radii of DTP- $\text{H}^\bullet$  are 9.586 and 14.017 Å for Ph-DTP- $\text{H}^\bullet$  and TPA-DTP- $\text{H}^\bullet$ , respectively.

$$\lambda_0 = 95 \left( \frac{1}{2r_{\text{Ar}_2\text{I}^+}} + \frac{1}{2r_{\text{DTP-H}^\bullet}} - \frac{1}{r_{\text{Ar}_2\text{I}^+} + r_{\text{DTP-H}^\bullet}} \right)$$

$$\lambda_0 (\text{Ph-DTP}) = 5.47 \text{ kcal/mol}$$

$$\lambda_0 (\text{TPA-DTP}) = 4.99 \text{ kcal/mol}$$

$$\Delta G_0^\ddagger = \frac{\lambda_0 + D_B}{4}$$

$$\Delta G_0^\ddagger (\text{Ph-DTP}) = 16.7 \text{ kcal/mol}$$

$$\Delta G_0^\ddagger (\text{TPA-DTP}) = 6.24 \text{ kcal/mol}$$

$$\Delta G^\ddagger = \Delta G_0^\ddagger \left( 1 + \frac{\Delta_r G^\theta}{4\Delta G_0^\ddagger} \right)^2$$

$$\Delta G^\ddagger (\text{Ph-DTP}) = 115.11 \text{ kcal/mol}$$

$$\Delta G^\ddagger (\text{TPA-DTP}) = 119.33 \text{ kcal/mol}$$

$$\mu = \frac{M_{\text{DTP-H}^\bullet} M_{\text{Ar}_2\text{I}^+}}{M_{\text{DTP-H}^\bullet} + M_{\text{Ar}_2\text{I}^+}}$$

$$\mu (\text{Ph-DTP}) = 207.81 \text{ g mol}^{-1}$$

$$\mu (\text{TPA-DTP}) = 260.77 \text{ g mol}^{-1}$$

$$Z = N_A \sqrt{\frac{8\pi RT}{\mu}} (r_{\text{Ar}_2\text{I}^+} + r_{\text{DTP-H}^\bullet})^2$$

$$Z (\text{Ph-DTP}) = 1.02 \times 10^{12} \text{ M}^{-1} \text{ s}^{-1}$$

$$Z (\text{TPA-DTP}) = 1.43 \times 10^{12} \text{ M}^{-1} \text{ s}^{-1}$$

$$k_{D-b} = Z \exp\left(-\frac{\Delta G^\ddagger}{RT}\right)$$

$$K_{D-b} (\text{Ph-DTP}) = 4.2 \times 10^{-73} \text{ M}^{-1} \text{ s}^{-1}$$

$$K_{D-b} (\text{TPA-DTP}) = 4.75 \times 10^{-76} \text{ M}^{-1} \text{ s}^{-1}$$

To obtain the concentration of DTP-H<sup>•</sup>, the reaction equilibrium constant  $k_f$  of reaction D-a should be calculated.

$$k_f = e^{-\frac{\Delta_r G^\theta(\text{D-a})}{RT}} = \frac{[\text{EDB}^\bullet(-\text{H})][\text{DTP-H}^\bullet]}{[\text{EDB}^{\bullet+}][\text{DTP}^{\bullet-}]}$$

$$k_f (\text{Ph-DTP}) = 4.38 \times 10^{-11}$$

$$k_f (\text{TPA-DTP}) = 4.85 \times 10^{-28}$$

$$[\text{Ph-DTP-H}^\bullet] = 8.06 \times 10^{-16} \text{ M}$$

$$[\text{TPA-DTP-H}^\bullet] = 8.92 \times 10^{-33} \text{ M}$$

$$R_{D-b} = k_{D-b} [\text{DTP-H}^\bullet][\text{Ar}_2\text{I}^+]$$

$$R_{D-b} (\text{Ph-DTP}) = 6.23 \times 10^{-90} \text{ Ms}^{-1}$$

$$R_{D-b} (\text{TPA-DTP}) = 7.8 \times 10^{-110} \text{ Ms}^{-1}$$

$$R/R_t (\text{Ph-DTP}) = 2.97 \times 10^{-82}$$

$$R/R_t (\text{TPA-DTP}) = 3.71 \times 10^{-102}$$

In reaction D-c, the DFT calculated free energy  $\Delta_r G^\theta$  is  $-144.31$  kcal/mol, while  $D_B$  is the same as the one in reaction D-a.  $r_{\text{eff}}$  can be obtained by  $\frac{(2r_{\text{Ar}^\bullet} - r_{\text{H}})r_{\text{H}}}{r_{\text{Ar}^\bullet}}$ , giving the value of  $2.088 \text{ \AA}$ .

$$\lambda_0 = 95 \left( \frac{1}{2r_{\text{EDB}^\bullet(-\text{H})}} + \frac{1}{2r_{\text{eff}}} - \frac{1}{r_{\text{EDB}^\bullet(-\text{H})} + r_{\text{eff}}} \right)$$

$$= 19.08 \text{ kcal/mol}$$

$$\Delta G_0^\ddagger = \frac{\lambda_0 + D_B}{4}$$

$$= 49.04 \text{ kcal/mol}$$

$$\Delta G^\ddagger = \Delta G_0^\ddagger \left( 1 + \frac{\Delta_r G^\theta}{4\Delta G_0^\ddagger} \right)^2$$

$$= 3.43 \text{ kcal/mol}$$

$$Z = N_A^2 8\pi^2 \sqrt{\frac{2RT}{\pi}} \left[ \left( \frac{m_A + m_B}{m_A m_B} \right)^{\frac{1}{2}} + \left( \frac{m_B + m_C}{m_B m_C} \right)^{\frac{1}{2}} \right] d_{A \leftrightarrow B}^2 d_{B \leftrightarrow C}^2 \delta$$

Here, we define A = EDB<sup>•</sup>(-H), B = H<sup>+</sup> and C = Ar<sup>•</sup>.

$$Z = 6.83 \times 10^{11} \text{ M}^{-2}\text{s}^{-1}$$

$$k_{\text{D-c}} = Z \exp\left(-\frac{\Delta G^\ddagger}{RT}\right)$$

$$= 2.1 \times 10^9 \text{ M}^{-2}\text{s}^{-1}$$

Above all, the bond dissociation energy of  $\text{EDB}^{\bullet+}$  of 177.08 kcal/mol and high barriers of 53.13 (Ph-DTP $^{\bullet-}$ ) and 66.24 kcal/mol (TPA-DTP $^{\bullet-}$ ) indicate that path D is hard to carry out.

### Path D'

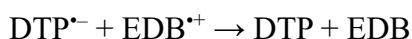

In reaction D', the DFT calculated free energy  $\Delta_r G^\theta$  is -59.27 kcal/mol for the Ph-DTP case and -60.53 kcal/mol for the TPA-DTP case.  $\lambda_0$  and  $Z$  are same as the one shown in path D-a.

$$\Delta G_0^\ddagger = \frac{\lambda_0}{4}$$

$$\Delta G_0^\ddagger (\text{Ph-DTP}) = 1.52 \text{ kcal/mol}$$

$$\Delta G_0^\ddagger (\text{TPA-DTP}) = 1.44 \text{ kcal/mol}$$

$$\Delta G^\ddagger = \Delta G_0^\ddagger \left(1 + \frac{\Delta_r G^\theta}{4\Delta G_0^\ddagger}\right)^2$$

$$\Delta G^\ddagger (\text{Ph-DTP}) = 115.91 \text{ kcal/mol}$$

$$\Delta G^\ddagger (\text{TPA-DTP}) = 130.7 \text{ kcal/mol}$$

Above all, the high barriers of 115.91 (Ph-DTP $^{\bullet-}$ ) and 130.7 kcal/mol (TPA-DTP $^{\bullet-}$ ) indicate that path D' is hard to carry out. Then the calculation for  $K_{\text{D}'}$  and  $R_{\text{D}'}$  has no significance.

### Path E

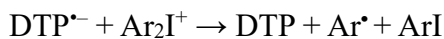

In reaction E, DTP $^{\bullet-}$  first reacts with  $\text{Ar}_2\text{I}^+$  to give birth to DTP, ArI and  $\text{Ar}^\bullet$  species. The co-existing  $\text{EDB}^{\bullet+}/\text{Ar}^\bullet/\text{ArI}$  components then undergo reduction reactions E1–E5 to regenerate EDB and  $\text{Ar}_2\text{I}^+$ . It should be noted that paths E1–E5 are the same as paths B1–B5.

In the first step of reaction E, the DFT calculated free energy  $\Delta_r G^\theta$  is -33.51 kcal/mol for the Ph-DTP case and -34.76 kcal/mol for the TPA-DTP case.  $D_{\text{B}}$  and  $\mu$  are the same as the ones in reaction Act-1.

$$\lambda_0 = 95 \left( \frac{1}{2r_{Ar_2I^+}} + \frac{1}{2r_{DTP^{\bullet-}}} - \frac{1}{r_{Ar_2I^+} + r_{DTP^{\bullet-}}} \right)$$

$$\lambda_0 \text{ (Ph-DTP)} = 5.47 \text{ kcal/mol}$$

$$\lambda_0 \text{ (TPA-DTP)} = 4.99 \text{ kcal/mol}$$

$$\Delta G_0^\ddagger = \frac{\lambda_0 + D_B}{4}$$

$$\Delta G_0^\ddagger \text{ (Ph-DTP)} = 2.055 \text{ kcal/mol}$$

$$\Delta G_0^\ddagger \text{ (TPA-DTP)} = 1.935 \text{ kcal/mol}$$

$$\Delta G^\ddagger = \Delta G_0^\ddagger \left( 1 + \frac{\Delta_r G^\theta}{4\Delta G_0^\ddagger} \right)^2$$

$$\Delta G^\ddagger \text{ (Ph-DTP)} = 19.45 \text{ kcal/mol}$$

$$\Delta G^\ddagger \text{ (TPA-DTP)} = 23.58 \text{ kcal/mol}$$

$$Z = N_A \sqrt{\frac{8\pi RT}{\mu}} (r_{Ar_2I^+} + r_{DTP^{\bullet-}})^2$$

$$Z \text{ (Ph-DTP)} = 1.025 \times 10^{12} \text{ M}^{-1}\text{s}^{-1}$$

$$Z \text{ (TPA-DTP)} = 1.44 \times 10^{12} \text{ M}^{-1}\text{s}^{-1}$$

$$k_E \text{ (Ph-DTP)} = 5.65 \times 10^{-3} \text{ M}^{-1}\text{s}^{-1}$$

$$k_E \text{ (TPA-DTP)} = 7.45 \times 10^{-6} \text{ M}^{-1}\text{s}^{-1}$$

$$R_E \text{ (Ph-DTP)} = 1.91 \times 10^{-9} \text{ Ms}^{-1}$$

$$R_E \text{ (TPA-DTP)} = 2.52 \times 10^{-12} \text{ Ms}^{-1}$$

$$R/R_t \text{ (Ph-DTP)} = 0.09$$

$$R/R_t \text{ (TPA-DTP)} = 1.2 \times 10^{-4}$$

Compared to path D and path D', path E has a moderate activation barrier and can offer a more likely deactivation mechanism for the Act-3 activation process. However, its low  $R/R_t$  values indicate that the deactivation of  $DTP^{\bullet-}$  is in competition with the biradical termination reaction. This will inevitably lead to a poor efficiency to obtain required photopolymerization results.

**Table S4.** Calculated activation energies of proposed deactivation paths, D, D' and E.

| Path |         | $\Delta G_1^\ddagger$ | Path |         | $\Delta G_2^\ddagger$ | $\Delta G_3^\ddagger$ |
|------|---------|-----------------------|------|---------|-----------------------|-----------------------|
|      |         | (kcal/mol)            |      |         | (kcal/mol)            | (kcal/mol)            |
| D    | Ph-DTP  | 53.13                 |      |         | 115.11                | 3.43                  |
|      | TPA-DTP | 66.24                 |      |         | 119.33                | 3.43                  |
| D'   | Ph-DTP  | 115.91                |      |         |                       |                       |
|      | TPA-DTP | 130.7                 |      |         |                       |                       |
| E    | Ph-DTP  | 19.45                 |      |         |                       |                       |
|      | TPA-DTP | 23.58                 |      |         |                       |                       |
|      |         |                       | E1   | Ph-DTP  | 12.15                 | —                     |
|      |         |                       |      | TPA-DTP | 12.15                 | —                     |
|      |         |                       | E2   | Ph-DTP  | 12.97                 | —                     |
|      |         |                       |      | TPA-DTP | 12.97                 | —                     |
|      |         |                       | E3   | Ph-DTP  | 7.52                  | —                     |
|      |         |                       |      | TPA-DTP | 7.52                  | —                     |
|      |         |                       | E4   | Ph-DTP  | 7.39                  | —                     |
|      |         |                       |      | TPA-DTP | 7.39                  | —                     |
|      |         |                       | E5   | Ph-DTP  | 9.24                  | —                     |
|      |         |                       |      | TPA-DTP | 9.24                  | —                     |

**Table S5.** Calculated rate constants of proposed deactivation paths D and E.

| Path        | Reaction                                                                        | Rate law                               | $k$ ( $M^{-1}s^{-1}$ ) | $R$ ( $Ms^{-1}$ )      | $R/R_t$                |
|-------------|---------------------------------------------------------------------------------|----------------------------------------|------------------------|------------------------|------------------------|
| Termination | $P_n^\bullet + P_n^\bullet \rightarrow P_n-P_n$                                 | $R_t = k_t [P_n^\bullet][P_n^\bullet]$ | $10^7$                 | $2.1 \times 10^{-8}$   | 1                      |
| D           | Ph-DTP $DTP^\bullet + EDB^{++} \rightarrow DTP-H^\bullet + EDB^\bullet(-H)$     | $R_D = k_D [EDB^{++}] [DTP^\bullet]$   | $1.25 \times 10^{-27}$ | $1.18 \times 10^{-34}$ | $5.62 \times 10^{-27}$ |
|             | $DTP-H^\bullet + Ar_2I^+ \rightarrow DTP + H^\bullet + ArI + Ar^\bullet$        |                                        |                        |                        |                        |
|             | TPA-DTP $EDB^\bullet(-H) + H^\bullet + Ar^\bullet \rightarrow EDB + Ar^\bullet$ |                                        | $4.64 \times 10^{-37}$ | $4.38 \times 10^{-44}$ | $2.09 \times 10^{-36}$ |
|             | $Ar^\bullet + ArI \rightarrow Ar_2I^\bullet$                                    |                                        |                        |                        |                        |
| E           | Ph-DTP $DTP^\bullet + Ar_2I^+ \rightarrow DTP + Ar^\bullet + ArI$               | $R_E = k_E [DTP^\bullet][Ar_2I^+]$     | $5.65 \times 10^{-3}$  | $1.91 \times 10^{-9}$  | 0.09                   |
|             | TPA-DTP                                                                         |                                        | $7.45 \times 10^{-6}$  | $2.52 \times 10^{-12}$ | $1.2 \times 10^{-4}$   |

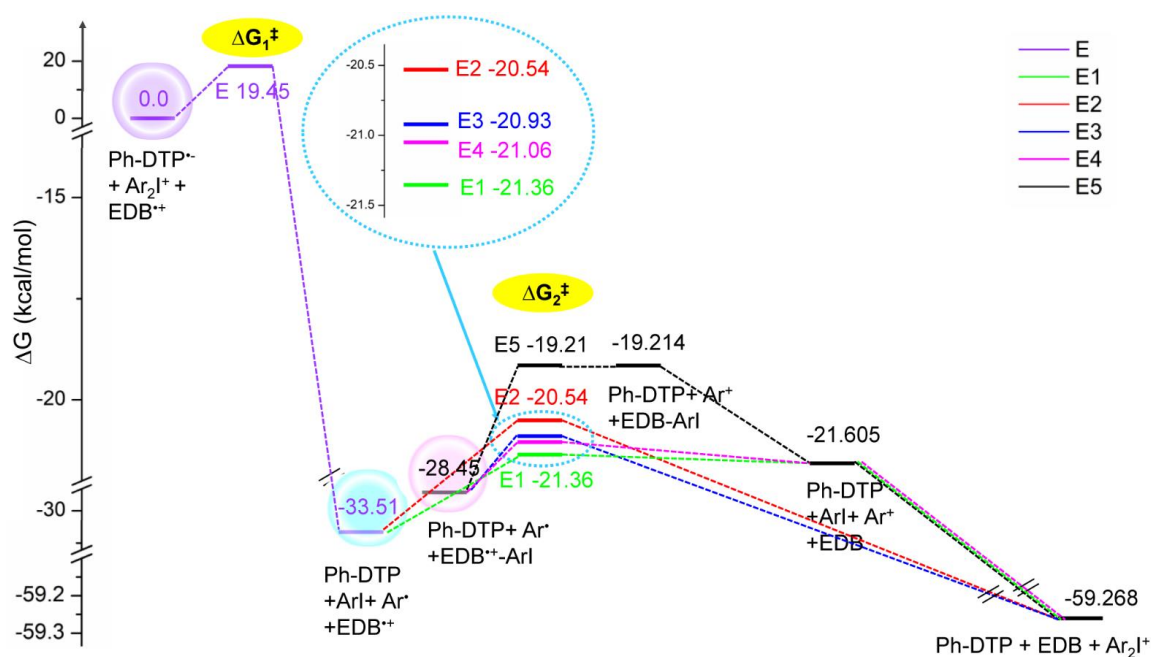

**Fig. S5** Energy profiles of Ph-DTP<sup>+</sup>/EDB/Ar<sub>2</sub>I<sup>+</sup> following E-series deactivation paths.

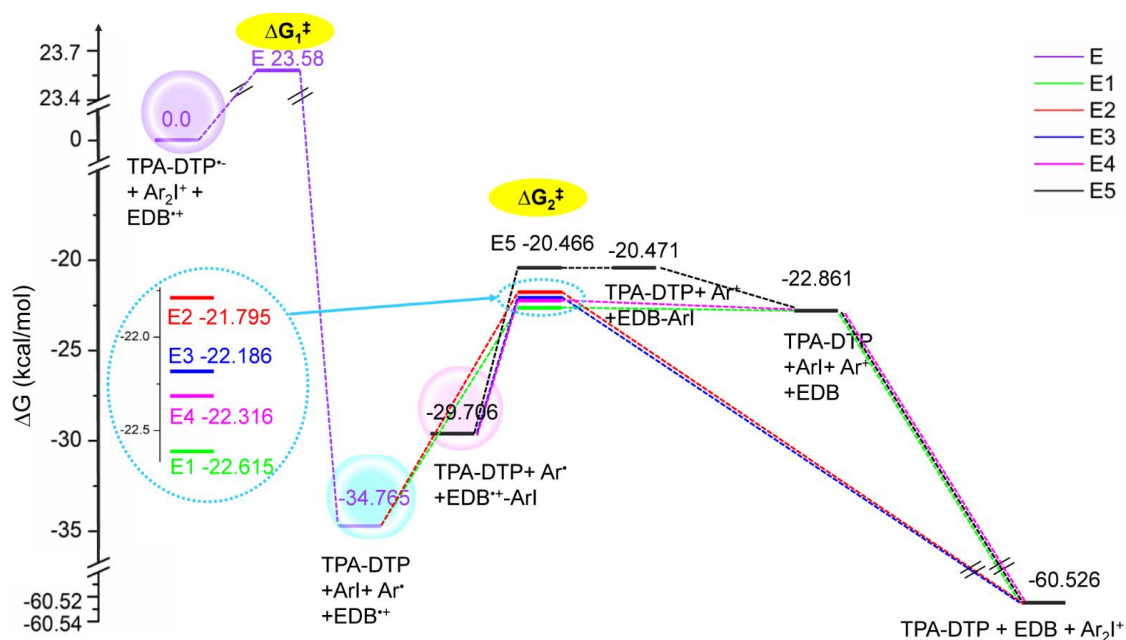

**Fig. S6** Energy profiles of TPA-DTP<sup>+</sup>/EDB/Ar<sub>2</sub>I<sup>+</sup> following E-series deactivation paths.

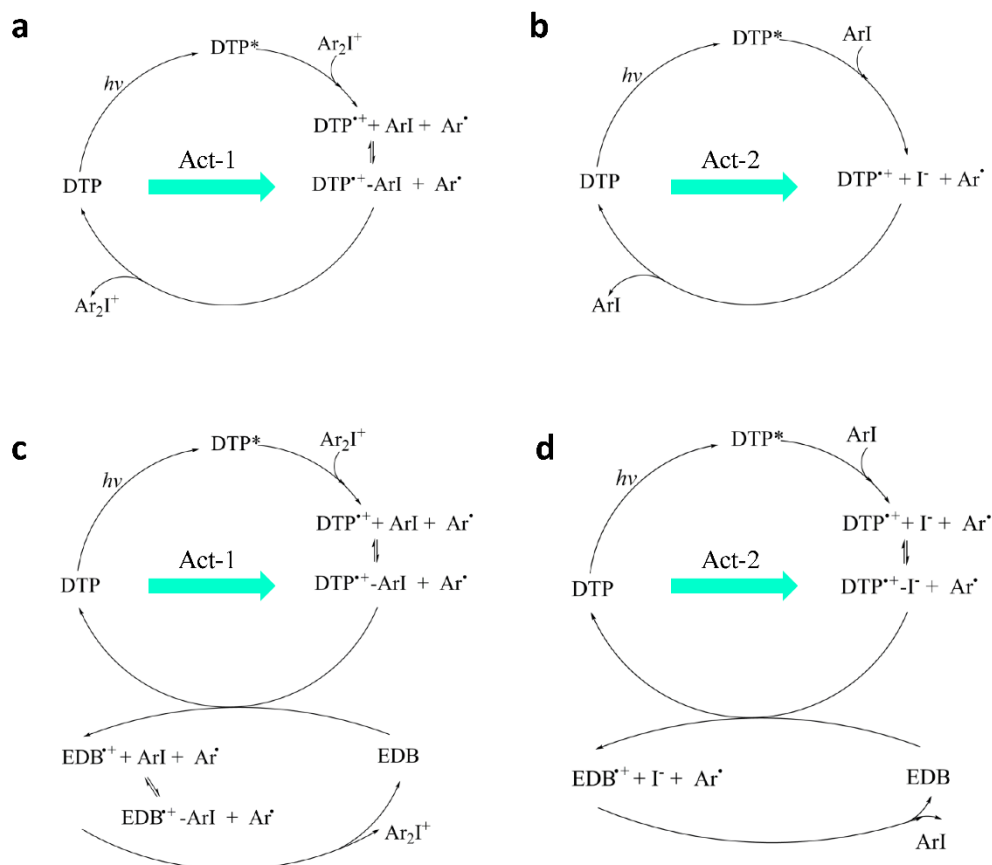

**Fig. S7** The overall main mechanism in the photo-catalytic cycle for the (a) DTPs- $\text{Ar}_2\text{I}^+$  system following the Act-1 activation process and A1-A5 deactivation processes, (b) DTPs-ArI system following the Act-2 activation process and A6-A10 deactivation processes, (c) DTPs- $\text{Ar}_2\text{I}^+$ -EDB system following the Act-1 activation process and B, B'-1, B1-B5 deactivation processes, (d) DTPs-ArI-EDB system following the Act-2 activation process and B, B'-2, B6-B10 deactivation processes.

It should be noted that the photo-catalytic cycles presented in Fig. 5 and Fig. S7 are the main efficient mechanisms with low barriers in both activation and deactivation for the propagation of the polymerization process. There are still, however, other possible reactions, even background or side reactions that would occur at the same time, which all need to be considered. Although  $\text{Ph-DTP}^{++}$  and  $\text{Ar}^\bullet$  will initiate photopolymerization, this will also result in biradical termination as the background reaction, giving rise to dead chain propagation. The existence of intermediate complexes, such as  $\text{Ph-DTP}^{++}\text{-ArI}$ ,  $\text{Ph-DTP}^{++}\text{-I}^-$ ,  $\text{EDB}^{++}\text{-ArI}$  and  $\text{EDB}^{++}\text{-I}^-$  will also promote the catalytic cycle, but through different reactions and alternative mechanisms. However, in view of the rather low concentrations of these intermediates, their relevant regeneration processes will be carried out at slow rates, which may be even slower than the biradical termination process, resulting

in a loss of the system's photo-catalytic capacity. Additionally, when the catalyst is in the excited state  $\text{Ph-DTP}^*$ , it is a strong reductant, and the generated radical can be reduced to a carbanion state. In accordance with the strong redox potential of  $\text{Ph-DTP}^{*+}$ , there is also a plausible situation whereby the  $\text{I}^-$  species could be oxidized to  $\text{I}_2$ , which will generate  $\text{I}^*$  on irradiation and initiate the propagation of polymerization. However, it must be noted that in practice, the above mentioned background or side reactions will inevitably decrease the reactivity of individual components and overall activity of the PC in the photo-catalytic cycle.



## Reference

1. R. A. Marcus, *J. Chem. Phys.*, 1956, **24**, 966-978.
2. A. A. Isse, A. Gennaro, C. Y. Lin, J. L. Hodgson, M. L. Coote and T. Guliashvili, *J. Am. Chem. Soc.*, 2011, **133**, 6254-6264.
3. C. Costentin, M. Robert and J.-M. Savéant, *J. Am. Chem. Soc.*, 2003, **125**, 10729-10739.
4. A. Cardinale, A. A. Isse, A. Gennaro, M. Robert and J.-M. Savéant, *J. Am. Chem. Soc.*, 2002, **124**, 13533-13539.
5. C. P. Andrieux, A. Le Gorande and J. M. Saveant, *J. Am. Chem. Soc.*, 1992, **114**, 6892-6904.
6. C. P. Andrieux, I. Gallardo, J. M. Savaent and K. B. Su, *J. Am. Chem. Soc.*, 1986, **108**, 638-647.
7. L. Pause, M. Robert and J.-M. Saveant, *J. Am. Chem. Soc.*, 2000, **122**, 9829-9835.
8. J. M. Saveant, *J. Am. Chem. Soc.*, 1987, **109**, 6788-6795.
9. J. M. Saveant, *J. Am. Chem. Soc.*, 1992, **114**, 10595-10602.
10. L. Pause, M. Robert and J.-M. Savéant, *J. Am. Chem. Soc.*, 2001, **123**, 4886-4895.
11. X. Pan, C. Fang, M. Fantin, N. Malhotra, W. Y. So, L. A. Peteanu, A. A. Isse, A. Gennaro, P. Liu and K. Matyjaszewski, *J. Am. Chem. Soc.*, 2016, **138**, 2411-2425.
12. H. Kojima and A. J. Bard, *J. Am. Chem. Soc.*, 1975, **97**, 6317-6324.
13. R. L. Donkers, F. Maran, D. D. M. Wayner and M. S. Workentin, *J. Am. Chem. Soc.*, 1999, **121**, 7239-7248.
14. W. A. Rehm D, *Isr. J.Chem.*, 1970, **8**, 259-271.
15. P. P. Romańczyk and S. S. Kurek, *Electrochim. Acta*, 2017, **255**, 482-485.
16. M. Bouzrati-Zerelli, M. Maier, C. P. Fik, C. Dietlin, F. Morlet-Savary, J. P. Fouassier, J. E. Klee and J. Lalevée, *Polym. Int.*, 2017, **66**, 504-511.
17. A. Al Mousawi, P. Garra, X. Sallenave, F. Dumur, J. Toufaily, T. Hamieh, B. Graff, D. Gigmes, J. P. Fouassier and J. Lalevée, *Macromolecules*, 2018, **51**, 1811-1821.
18. J. W. Moore and R. G. Pearson, *Kinetics and mechanism*, John Wiley & Sons, 1981.
